# Supplementary material for: Dye-loaded metal–organic helical capsules applied to the combination of photocatalytic H2S splitting and nitroaromatic hydrogenation
Source: Royal Society of Chemistry journal article supplement (doi:10.1039/d1cc06166f), 2021-12-03
Supplement: d1cc06166f1.pdf [file d1cc06166f1.pdf]

## Supporting information

# Dye-loaded metal-organic helical capsules applied to the combination of photocatalytic H<sub>2</sub>S splitting and nitroaromatic hydrogenation

Yang Yang, Hanning Li, Xu Jing,\* Yuchen Wu, Youpeng Shi and Chunying Duan\*

State Key Laboratory of Fine Chemicals, Zhang Dayu School of Chemistry, Dalian University of Technology, Dalian, 116024, China.

E-mail: xjing@dlut.edu.cn; cyduan@dlut.edu.cn

### Contents

1. Synthesis Methods
2. Crystallography
3. Experimental Section
4. HPLC data for the photocatalytic reactions
5. References

## 1. Synthesis Methods

### Materials and Methods

Unless otherwise specified, organic solvents were dried before using in accordance with standard methods. Other chemicals were of reagent grade and were obtained from commercial sources and used without further purification.

**Elemental analyses.** The elemental analyses of C, H and N were performed on a Vario EL III elemental analyzer.

**Nuclear magnetic resonance.**  $^1\text{H}$  NMR spectra were recorded on a Varian INOVA-400M spectrometer with chemical shifts reported in ppm.  $^{13}\text{C}$  NMR spectra were also measured on a Varian INOVA-400M spectrometer. The peak frequencies were referenced versus an internal standard (tetramethylsilane (TMS)) shifts at 0.0 ppm.

**Liquid chromatograph mass spectra.** The ESI mass spectra were collected on an HPLC-Q-ToF-MS spectrometer in acetonitrile/methanol solution.

**Electrochemical experiments.** The cyclic voltammetry (CV) was performed on a CHI 660E electrochemical workstation with a three-electrode system using a Ag/AgCl electrode as the reference electrode, 0.5 mm diameter platinum silk as the counter electrode, and a glassy carbon electrode as the working electrode. The measurements were performed after degassing the solutions with argon to eliminate the effects of oxygen.

**Isothermal titration calorimetry (ITC).** The ITC was performed on a Nano ITC (TA Instruments Inc.–Waters LLC) at atmospheric parameters and at 25.0 °C, giving the association constants and the thermodynamic parameters. The solution of guest in the syringe was sequentially injected under stirring at 250 rpm into a solution of host in the sample cell.

**Fluorescence spectra.** The solution fluorescence spectra was measured on Edinburgh FS920 steady-state fluorescence spectrophotometer using an excitation wavelength at 475 nm to guarantee the only excitation of FI and showing the emission intensity at 520 nm.

**Liquid UV-vis spectra.** The solution UV-vis spectra were recorded on a SHIMADZU UV 2600 UV-vis spectrophotometer.

**Gas chromatography.** The generated  $\text{H}_2$  was characterized by GC 7890T instrument analysis using a 5 Å molecular sieve column (0.6 m × 3.0 mm) with thermal conductivity detector, and argon as carrier gas.

**High-performance liquid chromatography.** The HPLC analysis were performed on SHIMADZU LC 2030 Plus analyzer using a ZORBAX SB-C18 reverse phase column (250 × 4.6 mm I.D, s-5  $\mu\text{M}$ ) eluting with methanol/water to determine the yields of the catalytic reactions. (Detection:  $\lambda = 270$  nm; Temperature: 25.0 °C.

### Synthetic procedures

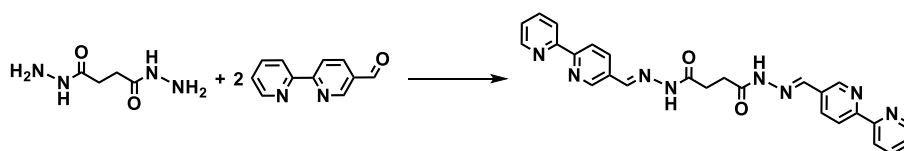

**Synthesis of L<sup>1</sup>.** Ten drops of acetic acid were added to a mixture of succinic dihydrazide (0.73 g, 5.0 mmol) and 2,2-bipyridine-5-carbaldehyde (1.84 g, 10.0 mmol) in a methanol solution. After the mixture was refluxed at 70 °C for 10 h, the precipitate was formed and collected by filtration. Yield: 92 %. Anal. Calc. for C<sub>26</sub>H<sub>22</sub>N<sub>8</sub>O<sub>2</sub>: H, 4.63; C, 65.26; N, 23.42. Found: H, 4.73; C, 65.28; N, 23.45. <sup>1</sup>H NMR (DMSO-d<sub>6</sub>, 400 MHz, ppm): 11.70–11.54 (m, 2H), 8.92–8.90 (dd, 2H), 8.71–8.68 (m, 2H), 8.46–8.38 (m, 4H), 8.29–8.23 (m, 3H), 8.10 (s, 1H), 7.99–7.93 (m, 2H), 7.49–7.46 (m, 2H), 2.51–2.49 (m, 4H). <sup>13</sup>C NMR (100 MHz, DMSO-d<sub>6</sub>) δ 166.7, 157.6, 155.0, 151.5, 149.2, 143.1, 137.4, 137.2, 123.7, 123.3, 121.4, 121.2, 34.2.

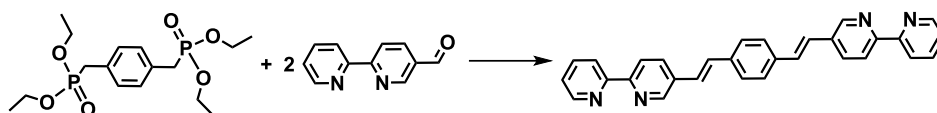

**Synthesis of L<sup>2</sup>.** Refluxing the mixture of 1,4-bis(bromomethyl)benzene (1.05 g, 4.0 mmol) and triethylphosphite (20 mL) at 160 °C for 6 hours. After the reaction completed, the excess triethylphosphite was removed under reduced pressure. The mixture was poured into excess hexanes and stirred for 30 minutes, then followed by filtration to obtain the 1,4-bis(diethoxyphosphinylmethyl)benzene as pale yellow solid with yield of 81 %.

A solution of 1,4-bis(diethoxyphosphinylmethyl)benzene (0.38 g, 1.0 mmol) and potassium tert-butoxide (0.45 g, 4.0 mmol) were added into 70 mL toluene and stirred for 30 minutes under Ar atmosphere. Then 30 mL toluene solution contained 2,2-bipyridine-5-carbaldehyde (0.42 g, 2.3 mmol) was added dropwise into the abovementioned solution. After stirred for 24 hours at room temperature, 100 mL 95 % ethanol was added into the reaction mixture and followed by another 1 hour stirring. After the reaction completed, the solvent was removed under reduced pressure, the residual solid was redissolved in chloroform and washed by water. The organic phase was dried over MgSO<sub>4</sub> and evaporated to dryness. The crude products were purified by recrystallization from ethanol. Yield: 70 %. Anal. Calc. for C<sub>30</sub>H<sub>22</sub>N<sub>4</sub>: H, 5.06; C, 82.17; N, 12.78. Found: H, 5.10; C, 82.19; N, 12.77. <sup>1</sup>H NMR (CDCl<sub>3</sub>, 400 MHz, ppm): 8.81 (d, 2H), 8.73–8.71 (d, 2H), 8.49–8.47 (m, 4H), 8.05–8.03 (d, 2H), 7.90–7.86 (m, 2H), 7.59 (s, 4H), 7.37–7.34 (m, 2H), 7.21–7.17 (m, 2H). <sup>13</sup>C NMR (100 MHz, DMSO-d<sub>6</sub>) δ 155.8, 155.2, 150.2, 149.0, 137.4, 136.6, 133.9, 130.4, 129.1, 128.5, 124.3, 123.6, 121.5, 121.2.

**Synthesis of C<sub>1</sub> (Fe<sub>2</sub>L<sup>1</sup><sub>3</sub>).** The ligand L<sup>1</sup> (71.8 mg, 0.15 mmol) and Fe(BF<sub>4</sub>)<sub>2</sub>·6H<sub>2</sub>O (33.8 mg, 0.10 mmol) were mixed in CH<sub>3</sub>CN solution and refluxed at 85 °C for 20 h. After the reaction mixture was cooled to room temperature, a dark purple precipitate was formed after the addition of diethyl ether and then was collected by filtration. Yield: 65 %. The purple crystals of C<sub>1</sub> were obtained by slowly diffusing diethyl ether into a DMF/CH<sub>3</sub>CN solution of C<sub>1</sub>. Anal. Calc. for C<sub>79</sub>H<sub>64</sub>N<sub>23</sub>O<sub>7</sub>B<sub>4</sub>F<sub>16</sub>Fe<sub>2</sub>: H, 3.38; C, 49.77; N, 16.90. Found: H, 3.44; C, 49.75; N, 16.92. <sup>1</sup>H NMR (DMSO-d<sub>6</sub>, 400 MHz, ppm): 9.74–9.44 (m, 4H), 8.58–8.45 (m, 12H), 8.14–8.05 (m, 12H), 7.77–7.70 (m, 4H), 7.65–7.58 (m, 4H), 7.43–7.34 (m, 12H), 2.37–2.31 (m, 12H). <sup>13</sup>C NMR (100 MHz, DMSO-d<sub>6</sub>) δ 172.77, 164.66, 158.50, 157.94, 154.06, 149.47, 139.27, 139.00, 138.53, 127.42, 124.37, 123.63, 36.32, 28.63. ESI-MS: m/z: 386.6074, [Fe<sub>2</sub>L<sup>1</sup><sub>3</sub>]<sup>4+</sup>; 544.4782, [Fe<sub>2</sub>L<sup>1</sup><sub>3</sub>·BF<sub>4</sub>]<sup>3+</sup>; 860.2183, [Fe<sub>2</sub>L<sup>1</sup><sub>3</sub>·2BF<sub>4</sub>]<sup>2+</sup>.

**Synthesis of C<sub>2</sub> (Fe<sub>2</sub>L<sup>2</sup><sub>3</sub>).** The ligand L<sup>2</sup> (65.7 mg, 0.15 mmol) and Fe(OTf)<sub>2</sub> (35.4 mg, 0.10 mmol) were mixed in CH<sub>3</sub>CN solution and refluxed at 85 °C for 20 h. After the reaction mixture was cooled to room temperature, a dark red precipitate was formed after the addition of diethyl ether and then was collected by filtration. Yield: 60 %. The dark red crystals of C<sub>2</sub> were obtained by slowly diffusing diethyl ether into a CH<sub>3</sub>CN solution of C<sub>2</sub>. Anal. Calc. for C<sub>96</sub>H<sub>66</sub>N<sub>13</sub>O<sub>12</sub>S<sub>4</sub>F<sub>12</sub>Fe<sub>2</sub>: H, 3.23; C, 55.93; N, 8.83. Found: H, 3.25; C, 55.94; N, 8.81. <sup>1</sup>H NMR (DMSO-d<sub>6</sub>, 400 MHz, ppm): 8.56–8.53 (m, 12H), 8.34–8.32 (m, 3H), 8.13–8.09 (m, 9H), 7.45–7.37 (m, 30H), 7.09–6.92 (m, 12H). <sup>13</sup>C NMR (100 MHz, DMSO-d<sub>6</sub>) δ 158.72, 157.16, 153.89, 150.00, 138.40, 138.26, 136.33, 136.27, 132.75, 129.54, 127.20, 126.84, 123.68, 123.45, 123.11. ESI-MS: m/z: 356.8560, [Fe<sub>2</sub>L<sup>2</sup><sub>3</sub>]<sup>4+</sup>; 525.4591, [Fe<sub>2</sub>L<sup>2</sup><sub>3</sub>·OTf]<sup>3+</sup>; 862.6650, [Fe<sub>2</sub>L<sup>2</sup><sub>3</sub>·2OTf]<sup>2+</sup>.

### General procedure for catalytic reactions

All catalytic reactions were carried out under a 300 W Xenon lamp (25 mW/cm<sup>2</sup>). The reaction temperature was maintained at 25 °C by circulating water through the outer packet of the reactor. The amount of hydrogen generated was determined by a GC7890T gas chromatograph equipped with a 5 Å molecular sieve column (0.6 m × 3 mm) and a thermal conductivity detector; argon was used as the carrier gas. The amount of hydrogen generated was determined by an external standard method, and the slight effect of the generated hydrogen gas on the pressure of the flask was neglected in the calculation of the volume of hydrogen gas. The yields of the amino products were determined by HPLC analysis performed on SHIMADZU LC 2030 Plus analyzer using a ZORBAX SB-C18 reverse phase column (250 × 4.6 mm I.D, s-5 μM) eluting with methanol/water to determine

the yields of the catalytic reactions.

The photocatalytic hydrogen generation reactions using Na<sub>2</sub>S as electron donor were carried out in a 25.0 mL home-made flask containing C<sub>1F</sub> or C<sub>2F</sub> (1.0 mM), Na<sub>2</sub>S (5.0 mmol, using a 1.0 M HCl solution to adjust the pH) in a CH<sub>3</sub>CN/H<sub>2</sub>O (v/v, 1/1) solution. The flask was degassed by bubbling argon for 20 min under atmospheric pressure at room temperature. The generated photoproduct H<sub>2</sub> was characterized on a GC 7890T instrument. The amount of hydrogen was determined using an external standard. After the reaction completed, the pH value of the reaction mixture was further adjust to 8.0 and the elemental sulfur was collect by filtration of the reaction mixture and followed by washing with CH<sub>3</sub>CN and H<sub>2</sub>O. The turnover number (TON) and TOF was calculated based on the amount of the generated hydrogen and the loading amount of the photocatalyst C<sub>F</sub>.

$$TON_{H_2} = n_{H_2}/n_{CF} \quad TOF_{H_2} = TON_{H_2}/t$$

The photocatalytic nitro compounds reduction reactions using Na<sub>2</sub>S as electron donor were also carried out in a home-made flask under the same conditions of hydrogen generation reactions with addition of nitro compounds 0.50 mmol. The yields of the corresponding amino compounds were measured by HPLC eluting with methanol/water using m-toluidine as integral standard. (Detection:  $\lambda = 270$  nm; Temperature: 25.0 °C; Flow rate: 0.8 mL/min).

Kinetics experiments for Michaelis-Menten mechanism analysis were carried out at conditions: C<sub>1F</sub>/C<sub>2F</sub> (5.0  $\mu$ mol), Na<sub>2</sub>S (5.0 mmol), and nitro substrates (0.05 mmol, 0.10 mmol, 0.25 mmol and 0.5 mmol, respectively) in 5.0 mL CH<sub>3</sub>CN/H<sub>2</sub>O (v/v, 1/1) solution with pH of 10.5. After blowing Ar gas for 20 minutes, the reaction mixture was irradiated under the Xenon lamp. The yields of amino product in the initial reaction stages were regarded as the initial rate of the reactions, which were further used in the reciprocal plot fitting.

$$Rate (\mu M \cdot s^{-1}) = \frac{[substrate] \times yield}{t}$$

## 2. Crystallography

The intensities were collected on a Bruker SMART APEX CCD diffractometer equipped with a graphite-monochromated Mo-K $\alpha$  ( $\lambda = 0.71073$  Å) radiation source; the data were acquired using the SMART and SAINT programs.<sup>S1,S2</sup> The structures were solved by direct methods and refined on F<sup>2</sup> by full-matrix least-squares methods using the SHELXTL version 5.1 software.<sup>S3</sup>

### Crystal data for C<sub>1</sub>

C<sub>79</sub>H<sub>64</sub>N<sub>23</sub>O<sub>7</sub>B<sub>4</sub>F<sub>16</sub>Fe<sub>2</sub>, Mr = 1906.48, Triclinic space group P-1, dark-red block, a = 12.773 (1) Å, b = 19.091 (2) Å, c = 22.774 (3) Å,  $\alpha = 104.066$  (5) °,  $\beta = 100.757$  (4) °,  $\gamma = 94.934$  (4) °, V = 5241.9 (10) Å<sup>3</sup>, Z = 2, Dc = 1.208 g cm<sup>-3</sup>, T = 120 (2) K,  $\mu$  (Mo-K $\alpha$ ) = 0.361 mm<sup>-1</sup>. [R<sub>int</sub> = 0.1043]. For 18645 unique reflects, final R<sub>1</sub>[with I > 2 $\sigma$ (I)] = 0.1133, wR<sub>2</sub> (all data) = 0.3456, GOOF = 1.023. CCDC NO. 2117502.

For the refinement of C<sub>1</sub>, except the disordered moieties and the particularly occupied counter ions and solvents non-hydrogen atoms were refined anisotropically. Except the solvent water molecules, hydrogen atoms were fixed geometrically at calculated distances and allowed to ride on the parent non-hydrogen atoms. Several bond distances in the counter BF<sub>4</sub><sup>-</sup> ions were restrained as idealized values. Thermal parameters on adjacent atoms of these counter BF<sub>4</sub><sup>-</sup> ions were restrained to be similar. The free solvent and the disordered solvent molecules have been removed out by using PLATON SQUEEZE program.

### Crystal data for C<sub>2</sub>

C<sub>96</sub>H<sub>66</sub>N<sub>13</sub>O<sub>12</sub>S<sub>4</sub>F<sub>12</sub>Fe<sub>2</sub>, Mr = 2061.53, Hexagonal space group P-3c1, dark-red block, a = 10.407 (3) Å, b = 10.407 (3) Å, c = 48.843 (12) Å,  $\alpha = \beta = 90.000$  °,  $\gamma = 120.000$  °, V = 4581 (3) Å<sup>3</sup>, Z = 2, Dc = 1.495 g cm<sup>-3</sup>, T = 223 (2) K,  $\mu$  (Mo-K $\alpha$ ) = 0.503 mm<sup>-1</sup>. [R<sub>int</sub> = 0.1290]. For 2738 unique reflects, final R<sub>1</sub>[with I > 2 $\sigma$ (I)] = 0.1199, wR<sub>2</sub> (all data) = 0.3444, GOOF = 1.158. CCDC NO. 2117508.

For the refinement of C<sub>2</sub>, except the solvent molecules, other non-hydrogen atoms were refined anisotropically, hydrogen atoms were fixed geometrically at calculated distances and allowed to ride on the parent non-hydrogen atoms. Several bond distances in benzene rings were restrained as idealized values. Thermal parameters on adjacent atoms of these atoms were restrained to be similar. And the C atom and S atom in one counter OTf<sup>-</sup> ion were disordered into three parts with the site occupied factors of each part being fixed as 0.33, respectively. The related bond distances in the counter ions were restrained as idealized values. Thermal parameters on adjacent atoms of the counter ions were restrained to be similar.

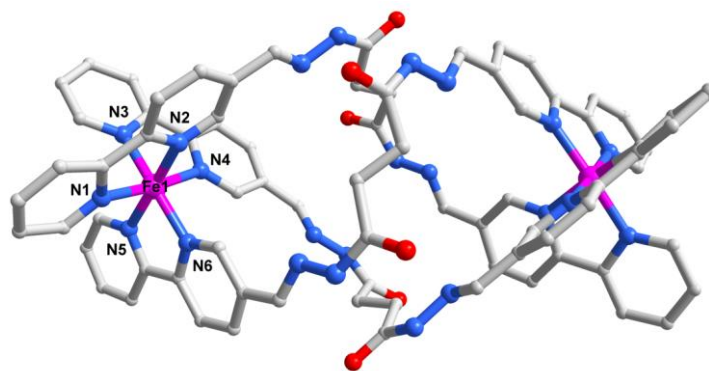

**Figure S1.** Molecular structure of  $C_1$  capsule within a unique asymmetric unit, showing the backbone of the ligand in the complex. Selected bond distances (Å) and angles ( $^\circ$ ): Fe1 – N1 1.969 (6), Fe1 – N2 1.964 (7), Fe1 – N3 1.968 (6), Fe1 – N4 1.976 (5), Fe1 – N5 1.958 (6), Fe1 – N6 1.967 (5), N1 – Fe1 – N2 81.6 (3), N1 – Fe1 – N3 94.3 (3), N1 – Fe1 – N4 176.3 (2), N1 – Fe1 – N5 93.2 (2), N1 – Fe1 – N6 89.2 (2), N2 – Fe1 – N3 91.1 (2), N2 – Fe1 – N4 97.5 (2), N2 – Fe1 – N5 172.9 (2), N2 – Fe1 – N6 93.2 (2), N3 – Fe1 – N4 82.1 (2), N3 – Fe1 – N5 94.2 (2), N3 – Fe1 – N6 174.8 (2), N4 – Fe1 – N5 88.0 (2), N4 – Fe1 – N6 94.4 (2), N5 – Fe1 – N6 81.8 (2).

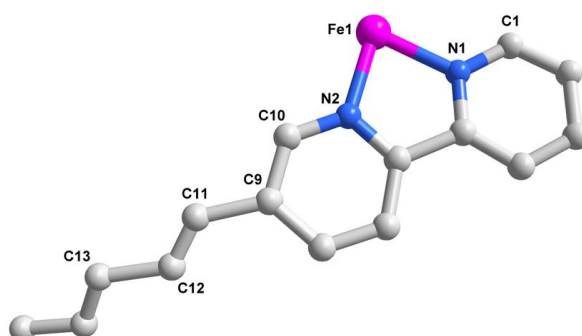

**Figure S2.** Molecular structure of  $C_2$  capsule within a unique asymmetric unit, showing the backbone of the ligand in the complex. Selected bond distances (Å) and angles ( $^\circ$ ): Fe1 – N1 1.969 (9), Fe1 – N2 1.962 (10), C9 – C11 1.504 (19), C11 – C12 1.151 (16), C12 – C13 1.537 (16), N1 – Fe1 – N2 90.3 (4), C9 – C11 – C12 128.5 (19), C12 – C13 – C14 121.0 (2).

### 3. Experimental Section

#### ESI-MS spectra data

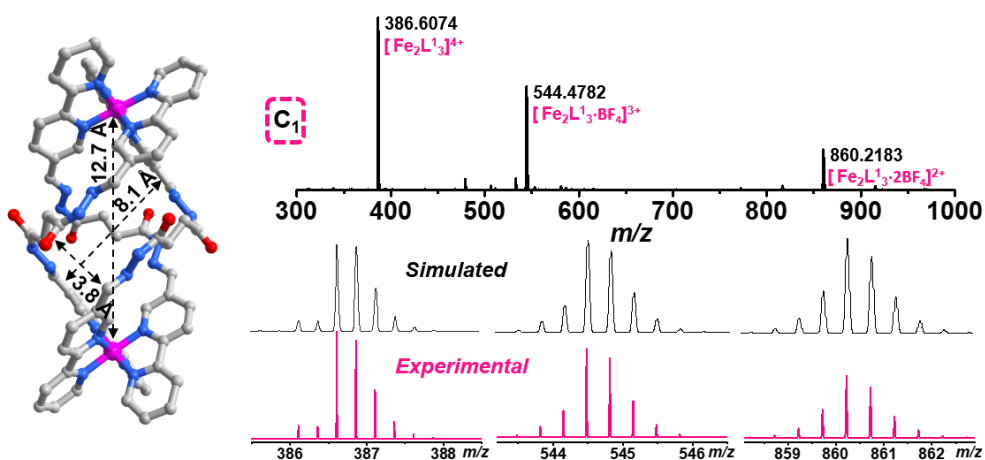

**Figure S3.** The ESI-MS spectrum of  $C_1$  (1.0 mM) in an  $\text{CH}_3\text{CN}$  solution exhibited three intense peaks at  $m/z = 386.6074$ ,  $544.4782$ , and  $860.2183$ , which were assigned to species of  $[\text{Fe}_2\text{L}_3]^{4+}$ ,  $[\text{Fe}_2\text{L}_3\cdot\text{BF}_4]^{3+}$ , and  $[\text{Fe}_2\text{L}_3\cdot 2\text{BF}_4]^{2+}$ , respectively.

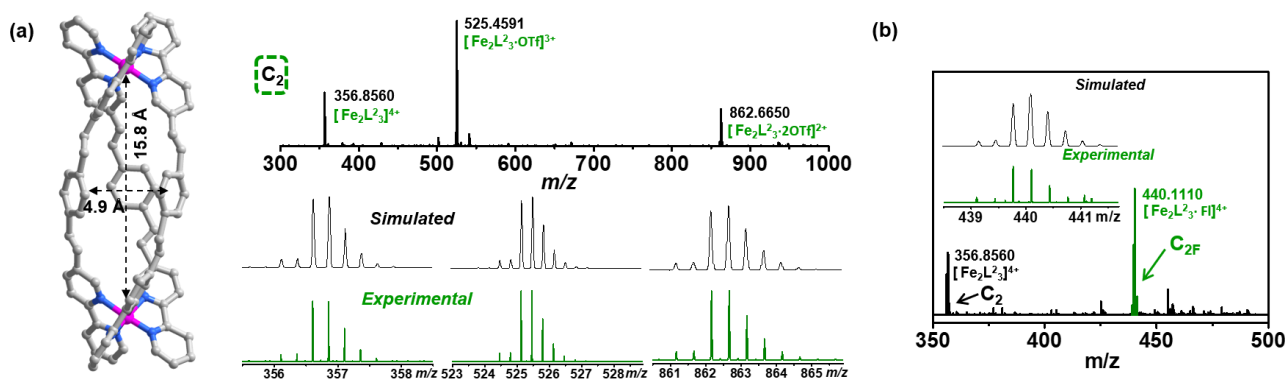

**Figure S4.** (a) The ESI-MS spectrum of  $C_2$  (1.0 mM) in an  $\text{CH}_3\text{CN}$  solution also exhibited three intense peaks at  $m/z = 356.8560$ ,  $525.4591$ , and  $862.6650$ , which were assigned to species of  $[\text{Fe}_2\text{L}_2^3]^{4+}$ ,  $[\text{Fe}_2\text{L}_2^3\cdot\text{BF}_4]^{3+}$ , and  $[\text{Fe}_2\text{L}_2^3\cdot 2\text{BF}_4]^{2+}$ , respectively. (b) The ESI-MS spectra of  $C_2$  (1.0 mM) with addition of  $\text{FI}$  (1.0 mM) in an  $\text{CH}_3\text{CN}$  solution, showing the peak corresponding to  $[\text{Fe}_2\text{L}_2^3\cdot\text{FI}]^{4+}$  at  $m/z = 440.1110$ .



### Microcalorimetric titration experiments of the interactions between capsules and dye molecules.

The ITC was performed on a Nano ITC (TA Instruments Inc.–Waters LLC) at atmospheric parameters and at 25.0 °C, giving the association constants and the thermodynamic parameters. The solution of guest in the syringe was sequentially injected under stirring at 250 rpm into a solution of host in the sample cell.

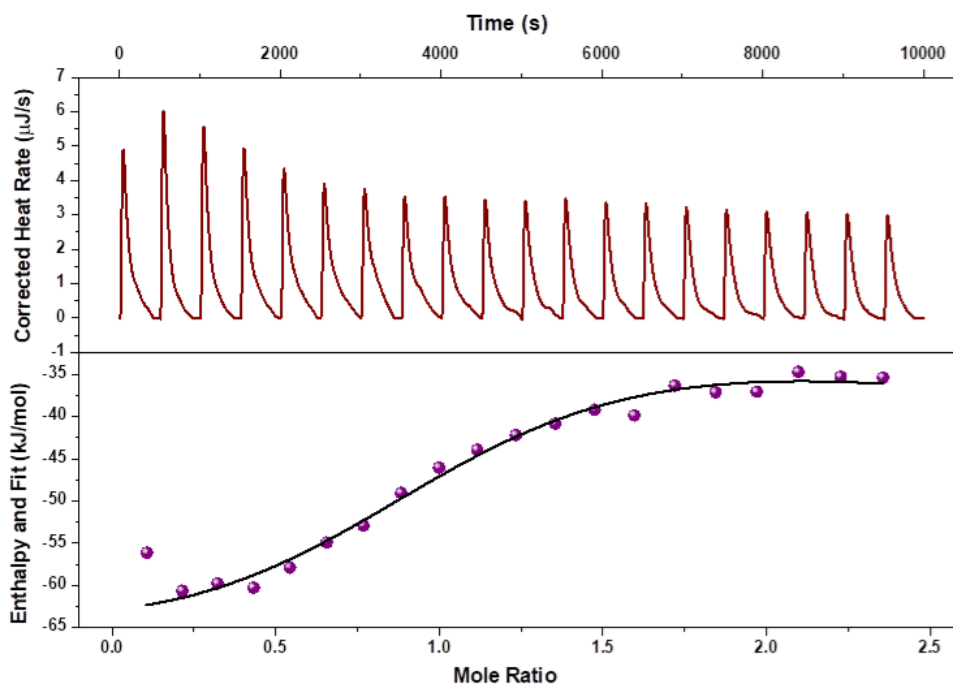

| Model            | Variable             | Value    | Conf. Interval |
|------------------|----------------------|----------|----------------|
| Independent      | Kd (M)               | 2.199E-5 | 1.370E-6       |
|                  | n                    | 1.095    | 0.097          |
|                  | $\Delta H$ (kJ/mol)  | -6.189   | 0.180          |
|                  | $\Delta S$ (J/mol·K) | 118.4    |                |
| Confidence level |                      | 99%      |                |

**Figure S5.** Microcalorimetric titration of  $C_1$  in  $CH_3CN$  solution at 298.00 K. (Top) Raw data for sequential 20 injections (10  $\mu L$  per injection) of FI solution injecting into  $C_1$  solution (0.1 mM). (Bottom) Apparent reaction heat obtained from the integration of calorimetric traces.

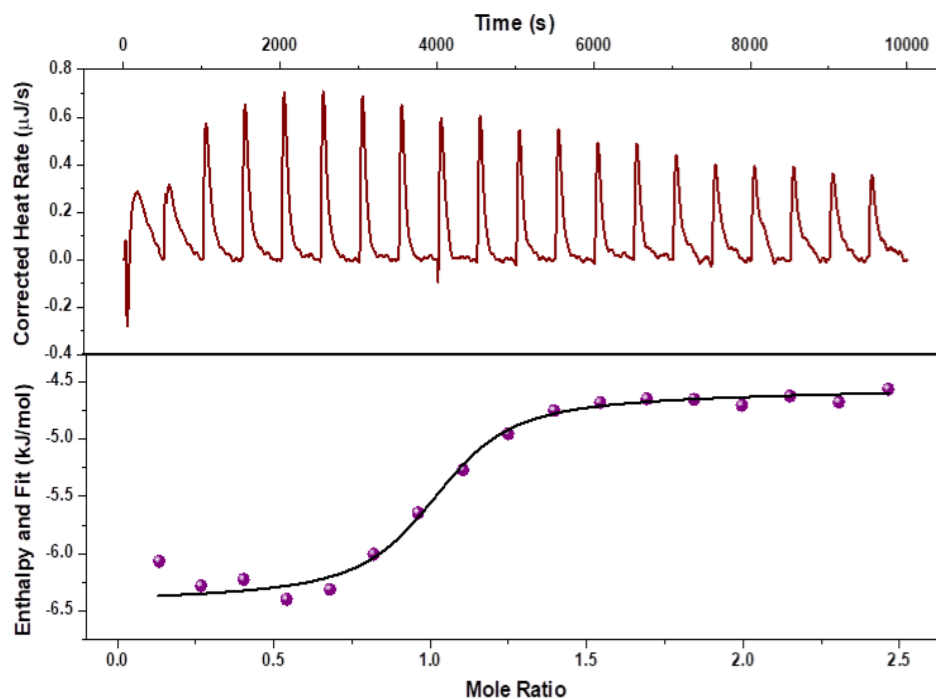

| Model            | Variable             | Value    | Conf. Interval |
|------------------|----------------------|----------|----------------|
| Independent      | Kd (M)               | 1.162E-5 | 1.495E-6       |
|                  | n                    | 0.966    | 0.056          |
|                  | $\Delta H$ (kJ/mol)  | -1.690   | 0.491          |
|                  | $\Delta S$ (J/mol·K) | 107.9    |                |
| Confidence level |                      | 99%      |                |

**Figure S6.** Microcalorimetric titration of  $C_2$  in  $CH_3CN$  solution at 298.00 K. (Top) Raw data for sequential 20 injections (10  $\mu L$  per injection) of **FI** solution injecting into  $C_2$  solution (0.1 mM). (Bottom) Apparent reaction heat obtained from the integration of calorimetric traces.

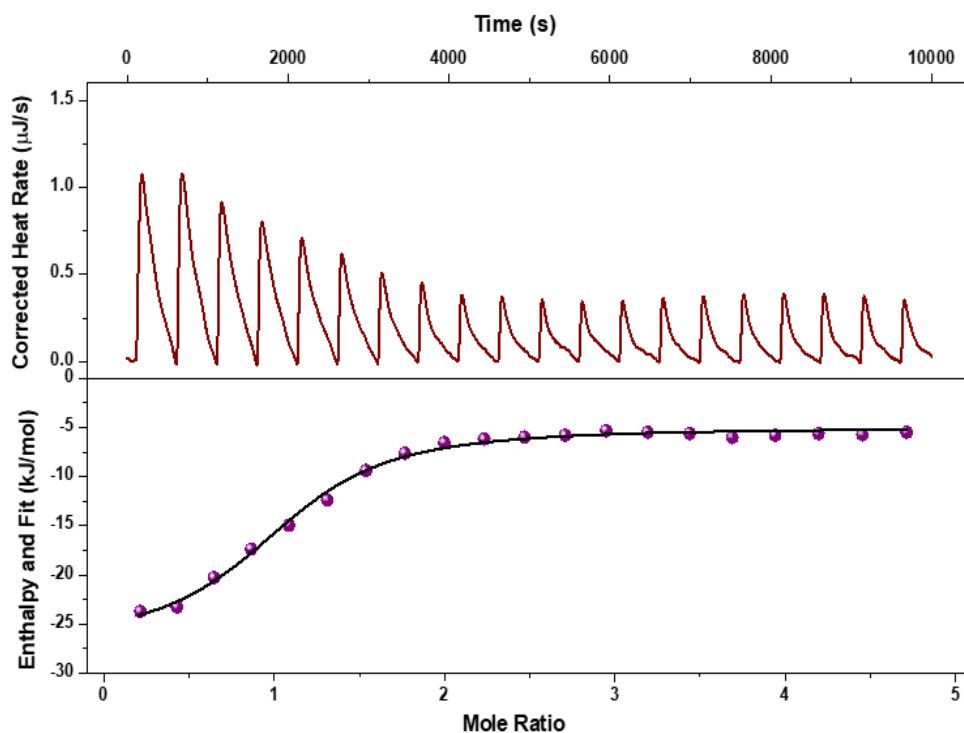

| Model            | Variable             | Value    | Conf. Interval |
|------------------|----------------------|----------|----------------|
| Independent      | Kd (M)               | 6.247E-6 | 6.321E-7       |
|                  | n                    | 1.021    | 0.091          |
|                  | $\Delta H$ (kJ/mol)  | -21.99   | 1.479          |
|                  | $\Delta S$ (J/mol·K) | 25.88    |                |
| Confidence level |                      | 99%      |                |

**Figure S7.** Microcalorimetric titration of  $C_{1F}$  in  $CH_3CN$  solution at 298.00 K. (Top) Raw data for sequential 20 injections (10  $\mu L$  per injection) of 9-nitroanthracene solution injecting into  $C_{1F}$  solution (0.1 mM). (Bottom) Apparent reaction heat obtained from the integration of calorimetric traces.

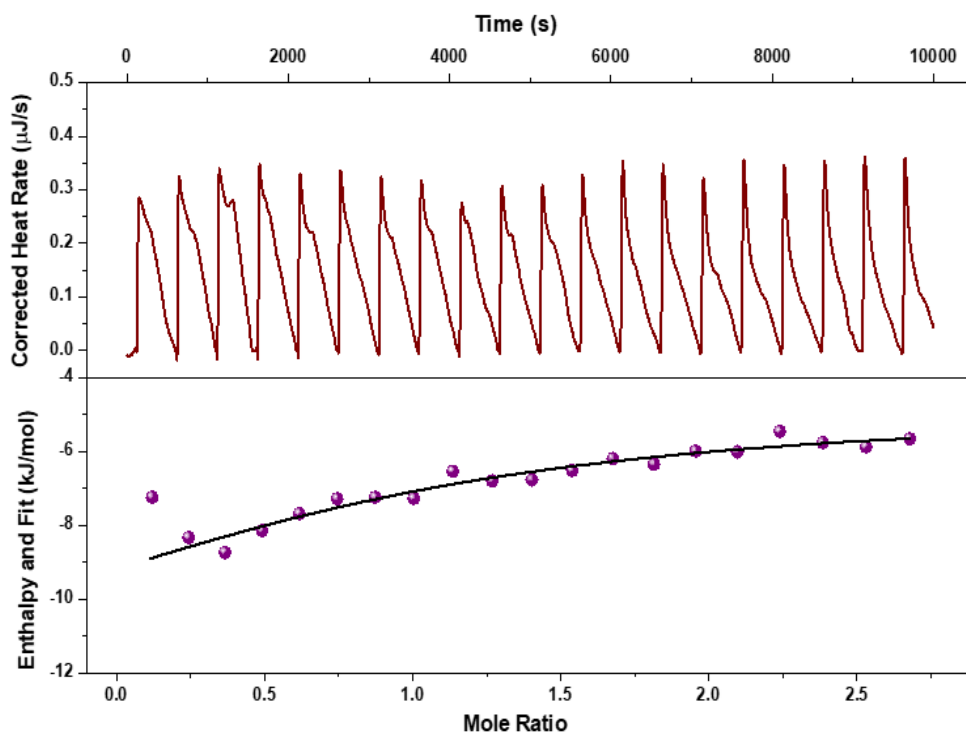

| Model            | Variable             | Value    | Conf. Interval |
|------------------|----------------------|----------|----------------|
| Independent      | Kd (M)               | 8.860E-5 | 3.770E-6       |
|                  | n                    | 0.976    | 0.126          |
|                  | $\Delta H$ (kJ/mol)  | -8.432   | 0.987          |
|                  | $\Delta S$ (J/mol·k) | 49.30    |                |
| Confidence level |                      | 99%      |                |

**Figure S8.** Microcalorimetric titration of  $C_{2F}$  in  $CH_3CN$  solution at 298.00 K. (Top) Raw data for sequential 20 injections (10  $\mu L$  per injection) of 9-nitroanthracene solution injecting into  $C_{2F}$  solution (0.1 mM). (Bottom) Apparent reaction heat obtained from the integration of calorimetric traces.

## Fluorescence titration experiment

The solution fluorescence spectra was measured on Edinburgh FS920 steady-state fluorescence spectrophotometer using an excitation wavelength at 475 nm to guarantee the only excitation of **FI** and showing the emission intensity at 520 nm. In an  $\text{CH}_3\text{CN}/\text{H}_2\text{O}$  solution containing **FI** (0.10 mM) (black line) upon addition of  $\text{C}_1$  or  $\text{C}_2$  successively (up to 40.0  $\mu\text{M}$ ), the fluorescence intensity quenching process was recorded. And nonlinear fitting was used for each titration curve to determine the host-guest behavior.

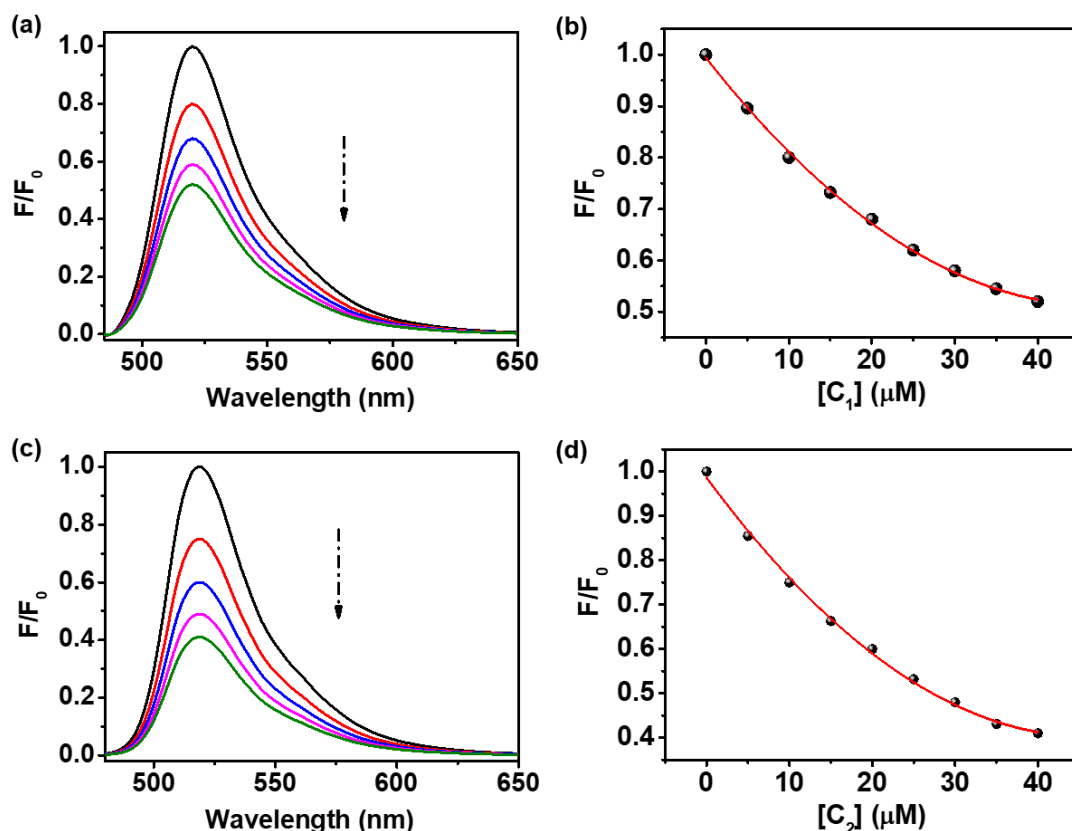

**Figure S9.** (a) Emission spectra of **FI** upon addition of  $\text{C}_1$  (excited at 475 nm). (b) Nonlinear fitting of the titration curve that suggested the 1:1 host-guest behavior with a constant of  $K_{a1} = 1.07 \pm 0.035 \times 10^5$ . (c) Emission spectra of **FI** upon addition of  $\text{C}_2$  (excited at 475 nm). (d) Nonlinear fitting of the titration curve that suggested the 1:1 host-guest behavior with a constant of  $K_{a2} = 2.19 \pm 0.065 \times 10^5$ .

### Electrochemical titration experiment

The cyclic voltammetry (CV) was performed on a CHI 660E electrochemical workstation with a three-electrode system using a Ag/AgCl electrode as the reference electrode, 0.5 mm diameter platinum silk as the counter electrode, and a glassy carbon electrode as the working electrode. The measurements were performed after degassing the solutions with argon to eliminate the effects of oxygen. The cyclic voltammetry of  $C_1$  and  $C_2$  were all displayed in acetonitrile solutions using 0.10 M (n-Bu<sub>4</sub>N)·(PF<sub>6</sub>) as supporting electrolyte with scan rate of 100 mV/s. The electrochemical titration experiments of  $C_1$  (0.1 mM) or  $C_2$  (0.1 mM) upon addition of Et<sub>3</sub>NHCl (2.0 mM) successively (up to 8.0 mM) were measured at the same conditions.

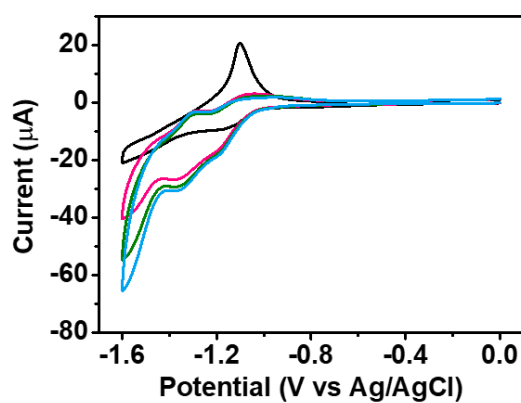

**Figure S10.** Cyclic voltammetry of  $C_2$  (0.10 mM) (black line) upon addition of Et<sub>3</sub>NHCl (colour lines). All the measurement was displayed in acetonitrile solutions containing 0.10 M (n-Bu<sub>4</sub>N)·(PF<sub>6</sub>) with a scan rate of 100 mV/s.

### UV/vis titration experiment

The solution UV-vis spectra were recorded on a SHIMADZU UV 2600 UV-vis spectrophotometer. UV/Vis spectra of  $C_1$  (10.0  $\mu\text{M}$ ) or  $C_2$  (10.0  $\mu\text{M}$ ) were recorded in an  $\text{CH}_3\text{CN}$  solution. The titration experiment of  $C_1$  (10.0  $\mu\text{M}$ ) or  $C_2$  (10.0  $\mu\text{M}$ ) upon addition of **FI** (10.0  $\mu\text{M}$ ) successively (up to 30.0  $\mu\text{M}$ ) were measured at the same conditions.

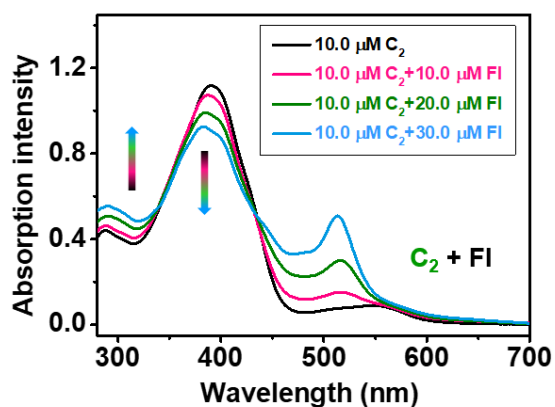

**Figure S11.** UV/Vis spectra of an  $\text{CH}_3\text{CN}$  solution containing  $C_2$  (10.0  $\mu\text{M}$ ) (black line) upon addition of **FI** (colored lines).

## The photocatalytic hydrogen generation using Na<sub>2</sub>S as electron donor

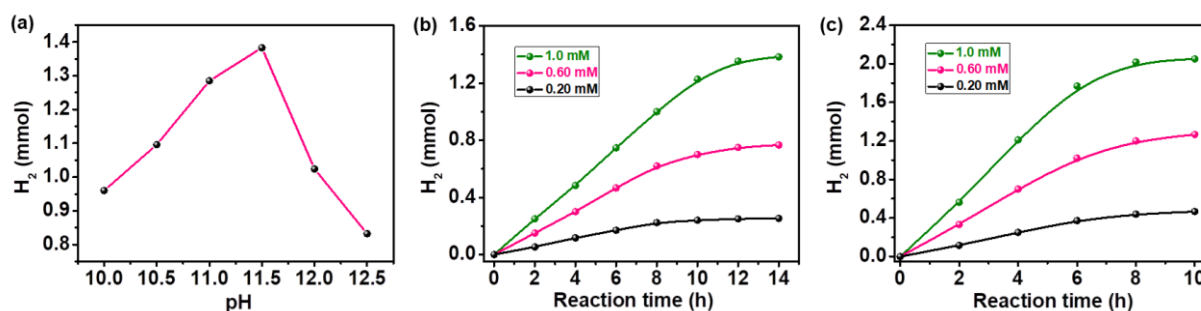

**Figure S12.** (a) The photocatalytic hydrogen generation in 1:1 acetonitrile/H<sub>2</sub>O (v/v) solution containing C<sub>1F</sub> (1.0 mM) and Na<sub>2</sub>S (5.0 mmol) at different pH values, showing the optimal pH value for the photocatalytic system at 11.5. (b) The kinetics of the photocatalytic hydrogen generation for systems in 1:1 acetonitrile/H<sub>2</sub>O (v/v) solution containing Na<sub>2</sub>S (5.0 mmol) at pH = 11.5 with different concentration of C<sub>1F</sub>. (c) The kinetics of the photocatalytic hydrogen generation for systems in 1:1 acetonitrile/H<sub>2</sub>O (v/v) solution containing Na<sub>2</sub>S (5.0 mmol) at pH = 11.5 with different concentration of C<sub>2F</sub>.



### Kinetics experiments of photocatalytic of nitro substrates reduction using $\text{Na}_2\text{S}$ as electron donor and the reciprocal (Lineweaver-Burk) plot fitting

During the reaction process, the tracking of the reaction process was carried by extraction of 50  $\mu\text{L}$  reaction mixture each time with a long needle and followed by HPLC analysis after the quick flush through the silica gel. The reaction rates in the initial stage were regarded as the initial rate of the reactions, which were further used in the reciprocal (Lineweaver-Burk) plot fitting.

**Table S1.** The determined constants of  $K_m$  and  $K_{cat}$  in the catalytic process with different substrates under standard conditions of  $\text{C}_{1\text{F}}$  and  $\text{C}_{2\text{F}}$  systems.

| Substrates        | $\text{C}_{1\text{F}}$ |                                      | $\text{C}_{2\text{F}}$ |                                      |
|-------------------|------------------------|--------------------------------------|------------------------|--------------------------------------|
|                   | $K_m$ (M)              | $K_{\text{Cat}}$ ( $\text{s}^{-1}$ ) | $K_m$ (M)              | $K_{\text{Cat}}$ ( $\text{s}^{-1}$ ) |
| Nitrobenzene      | $1.09 \times 10^{-3}$  | $3.14 \times 10^{-2}$                | $2.49 \times 10^{-3}$  | $2.39 \times 10^{-2}$                |
| 1-Nitroanthracene | $3.29 \times 10^{-3}$  | $2.58 \times 10^{-2}$                | $5.30 \times 10^{-3}$  | $1.24 \times 10^{-2}$                |
| 9-Nitroanthracene | $1.05 \times 10^{-2}$  | $1.19 \times 10^{-2}$                | $1.75 \times 10^{-2}$  | $8.08 \times 10^{-3}$                |
| 1-Nitropyrene     | $3.48 \times 10^{-2}$  | $6.33 \times 10^{-3}$                | $5.77 \times 10^{-2}$  | $5.73 \times 10^{-3}$                |

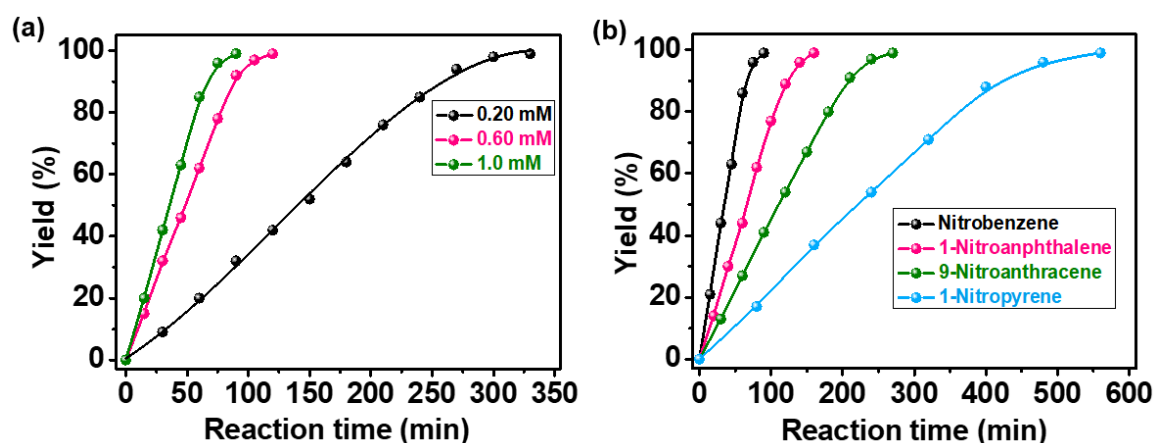

**Figure S13.** (a) Yields of photocatalytic nitrobenzene reduction under standard conditions with different loading of  $\text{C}_{2\text{F}}$ . (b) Kinetics of the aminoarene conversion with varied substrates under standard conditions of  $\text{C}_{2\text{F}}$  system.

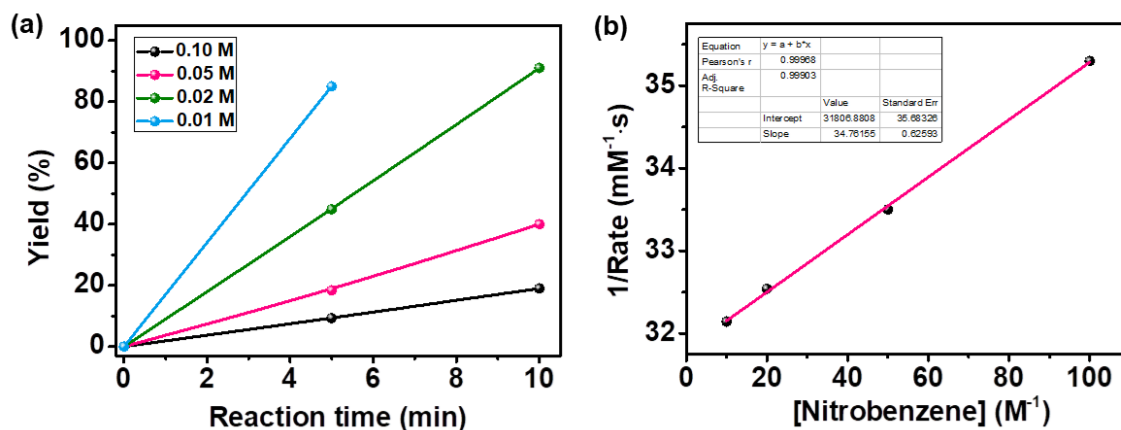

**Figure S14.** (a) Kinetics experiments of reduction reactions of nitrobenzene using Na<sub>2</sub>S as electron donor with different concentration of nitrobenzene in C<sub>1F</sub> system. (b) The reciprocal (Lineweaver-Burk) plot of the initial rate of nitrobenzene reduction and the concentration of [Nitrobenzene], suggested a Michaelis-Menten mechanism involving the catalytic process.

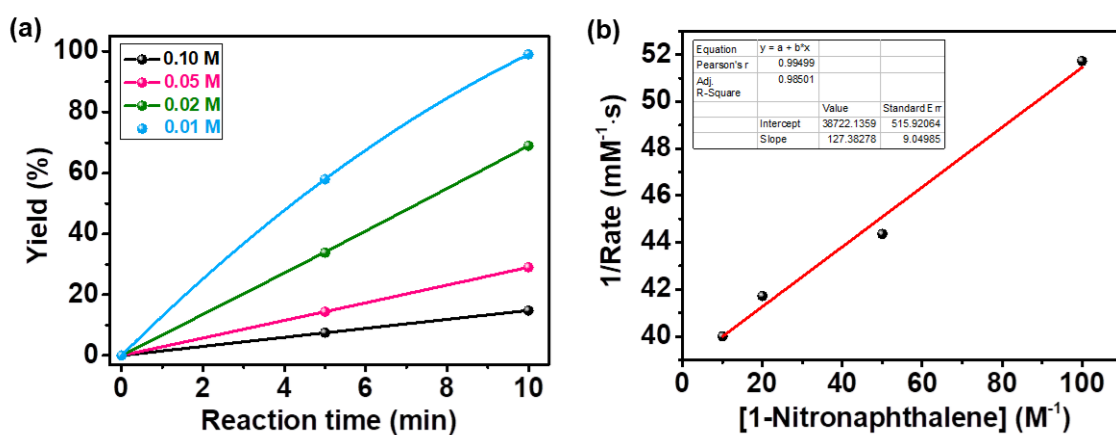

**Figure S15.** (a) Kinetics experiments of reduction reactions of 1-nitronaphthalene using Na<sub>2</sub>S as electron donor with different concentration of 1-nitronaphthalene in C<sub>1F</sub> system. (b) The reciprocal (Lineweaver-Burk) plot of the initial rate of 1-nitronaphthalene reduction and the concentration of [1-Nitronaphthalene], suggested a Michaelis-Menten mechanism involving the catalytic process.

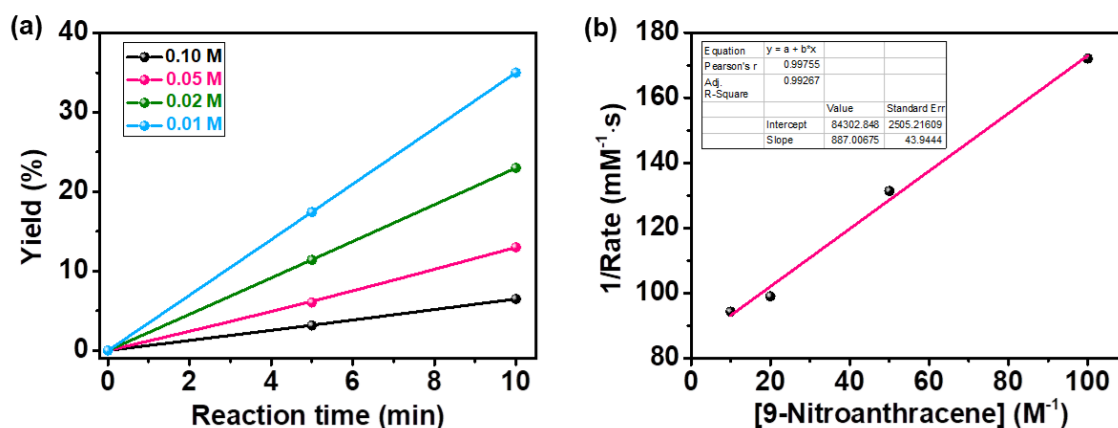

**Figure S16.** (a) Kinetics experiments of reduction reactions of 9-nitroanthracene using Na<sub>2</sub>S as electron donor with different concentration of 9-nitroanthracene in C<sub>1F</sub> system. (b) The reciprocal (Lineweaver-Burk) plot of the initial rate of 9-nitroanthracene reduction and the concentration of [9-Nitroanthracene], suggested a Michaelis-Menten mechanism involving the catalytic process.

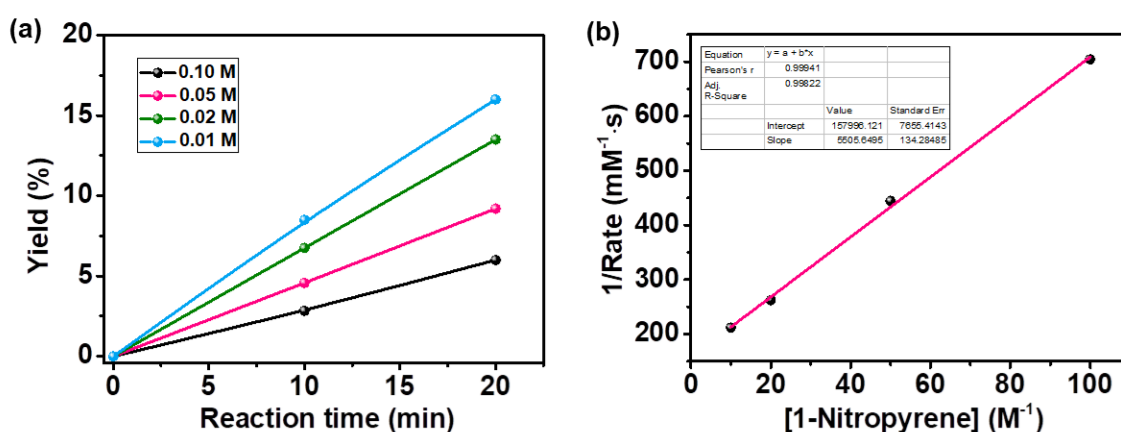

**Figure S17.** (a) Kinetics experiments of reduction reactions of 1-nitropyrene using Na<sub>2</sub>S as electron donor with different concentration of 1-nitropyrene in C<sub>1F</sub> system. (b) The reciprocal (Lineweaver-Burk) plot of the initial rate of 1-nitropyrene reduction and the concentration of [1-Nitropyrene], suggested a Michaelis-Menten mechanism involving the catalytic process.

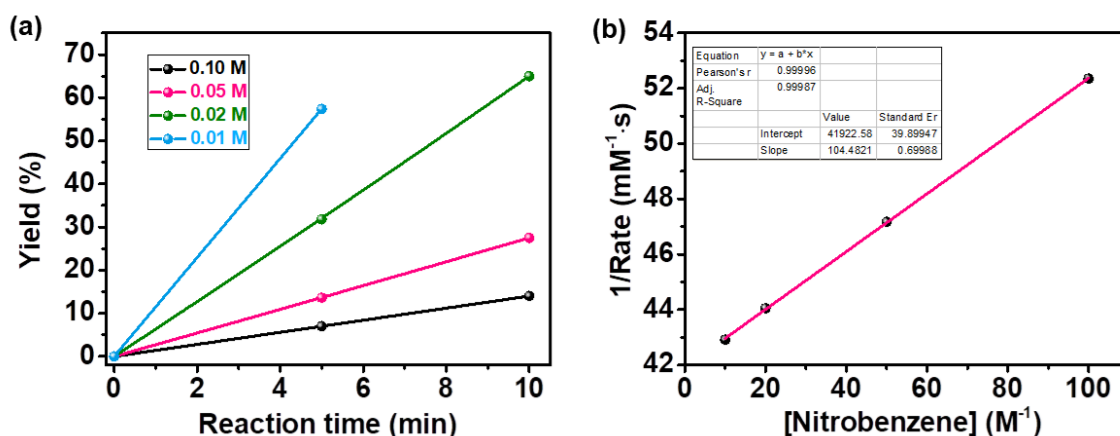

**Figure S18.** (a) Kinetics experiments of reduction reactions of nitrobenzene using Na<sub>2</sub>S as electron donor with different concentration of nitrobenzene in C<sub>2</sub>F system. (b) The reciprocal (Lineweaver-Burk) plot of the initial rate of nitrobenzene reduction and the concentration of [Nitrobenzene], suggested a Michaelis-Menten mechanism involving the catalytic process.

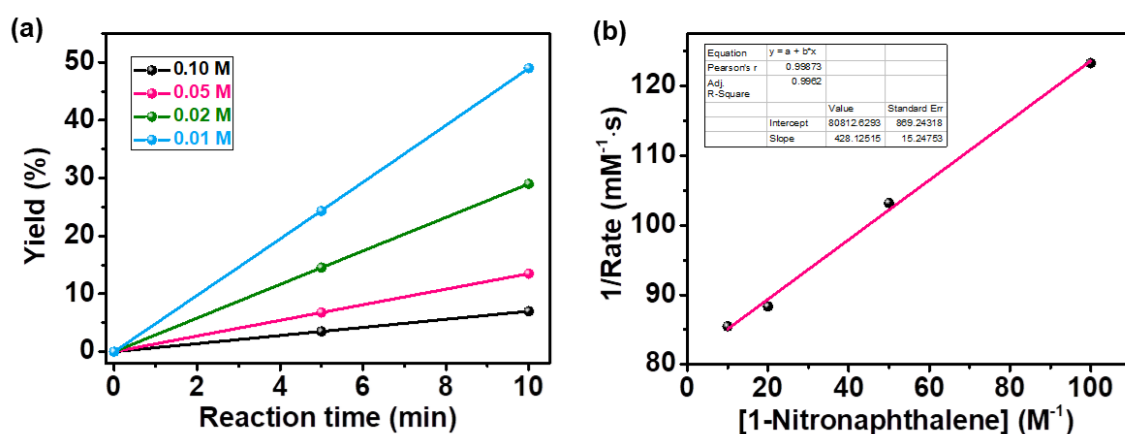

**Figure S19.** (a) Kinetics experiments of reduction reactions of 1-nitronaphthalene using Na<sub>2</sub>S as electron donor with different concentration of 1-nitronaphthalene in C<sub>2</sub>F system. (b) The reciprocal (Lineweaver-Burk) plot of the initial rate of 1-nitronaphthalene reduction and the concentration of [1-Nitronaphthalene], suggested a Michaelis-Menten mechanism involving the catalytic process.

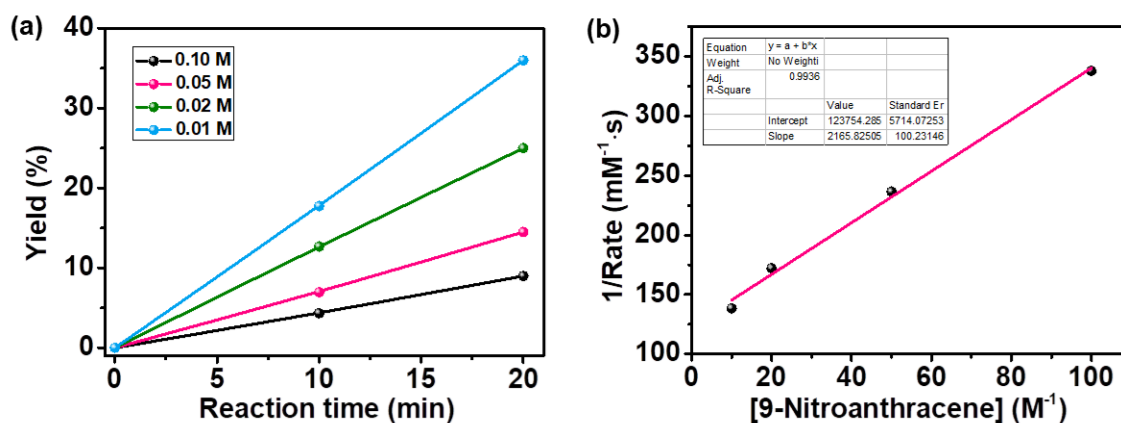

**Figure S20.** (a) Kinetics experiments of reduction reactions of 9-nitroanthracene using Na<sub>2</sub>S as electron donor with different concentration of 9-nitroanthracene in C<sub>2F</sub> system. (b) The reciprocal (Lineweaver-Burk) plot of the initial rate of 9-nitroanthracene reduction and the concentration of [9-Nitroanthracene], suggested a Michaelis-Menten mechanism involving the catalytic process.

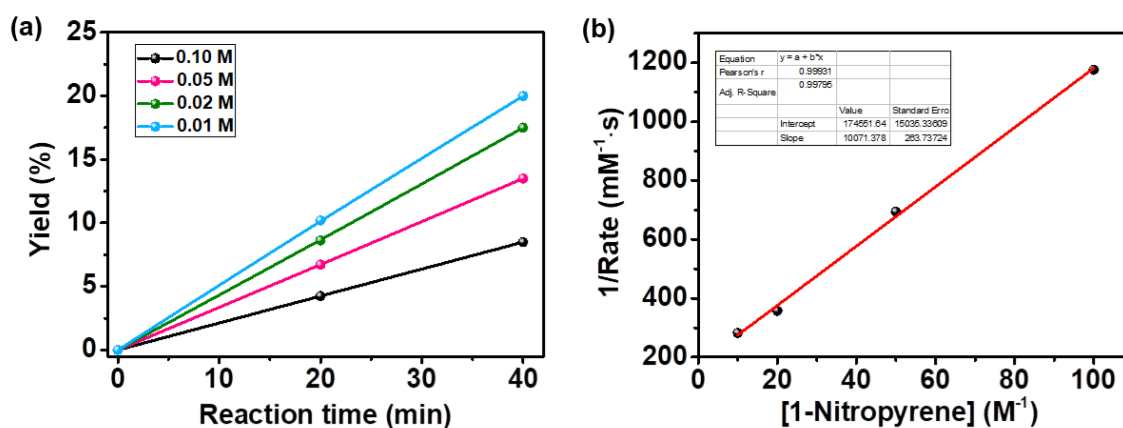

**Figure S21.** (a) Kinetics experiments of reduction reactions of 1-nitropyrene using Na<sub>2</sub>S as electron donor with different concentration of 1-nitropyrene in C<sub>1F</sub> system. (b) The reciprocal (Lineweaver-Burk) plot of the initial rate of 1-nitropyrene reduction and the concentration of [1-Nitropyrene], suggested a Michaelis-Menten mechanism involving the catalytic process.

#### 4. HPLC data for the photocatalytic reactions

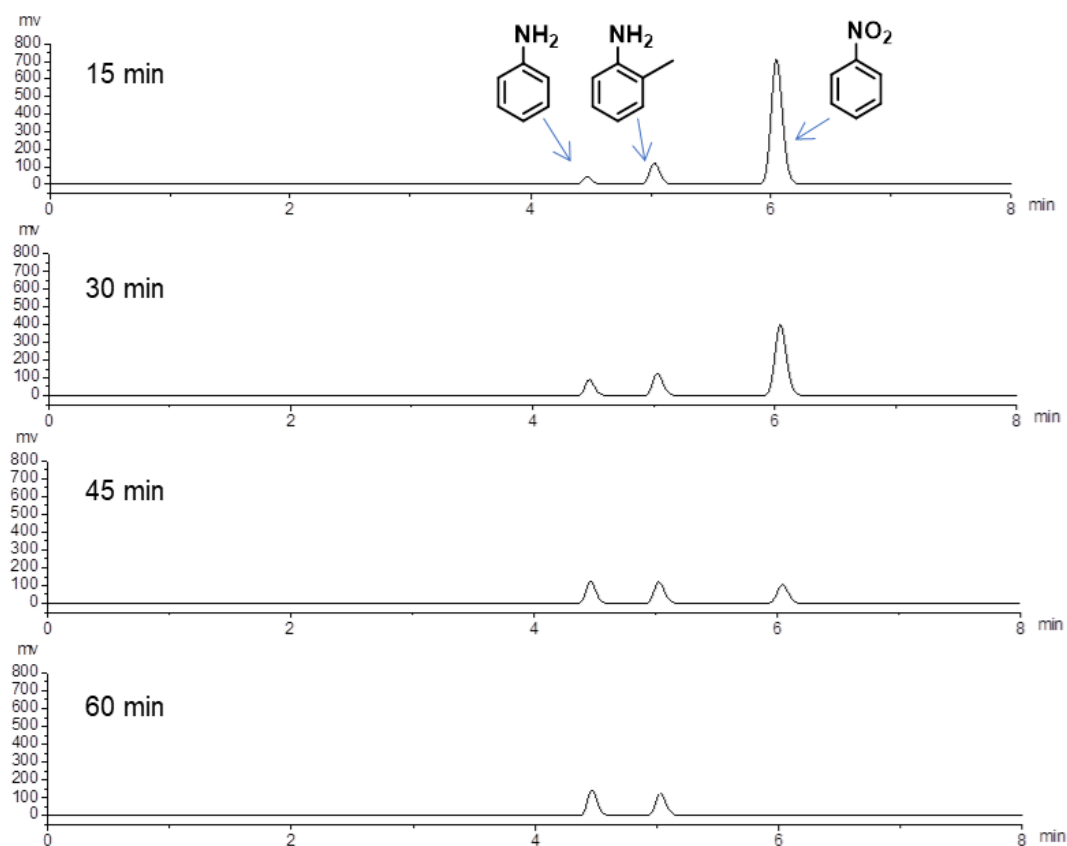

| Peaks  | Retention time (min) | Height  | Area     | Area (%) |
|--------|----------------------|---------|----------|----------|
| 15 min |                      |         |          |          |
| 1      | 4.468                | 44.053  | 253.568  | 4.354    |
| 2      | 5.029                | 120.920 | 758.014  | 13.016   |
| 3      | 6.045                | 711.309 | 4812.009 | 82.630   |
| 30 min |                      |         |          |          |
| 1      | 4.466                | 90.251  | 519.753  | 12.906   |
| 2      | 5.028                | 125.016 | 785.000  | 19.492   |
| 3      | 6.044                | 402.157 | 2722.517 | 67.602   |
| 45 min |                      |         |          |          |
| 1      | 4.467                | 126.939 | 729.489  | 33.300   |
| 2      | 5.029                | 120.444 | 755.161  | 34.472   |
| 3      | 6.045                | 104.325 | 705.995  | 32.228   |
| 60 min |                      |         |          |          |
| 1      | 4.466                | 145.595 | 838.217  | 51.989   |
| 2      | 5.028                | 123.270 | 774.076  | 48.011   |

**Figure S22.** HPLC data for the yields of aniline of the photocatalytic reduction of nitrobenzene catalyzed by  $C_{1F}$  (1.0 mM) using m-toluidine as internal standard at 15 min, 30 min, 45 min, 60 min, respectively.

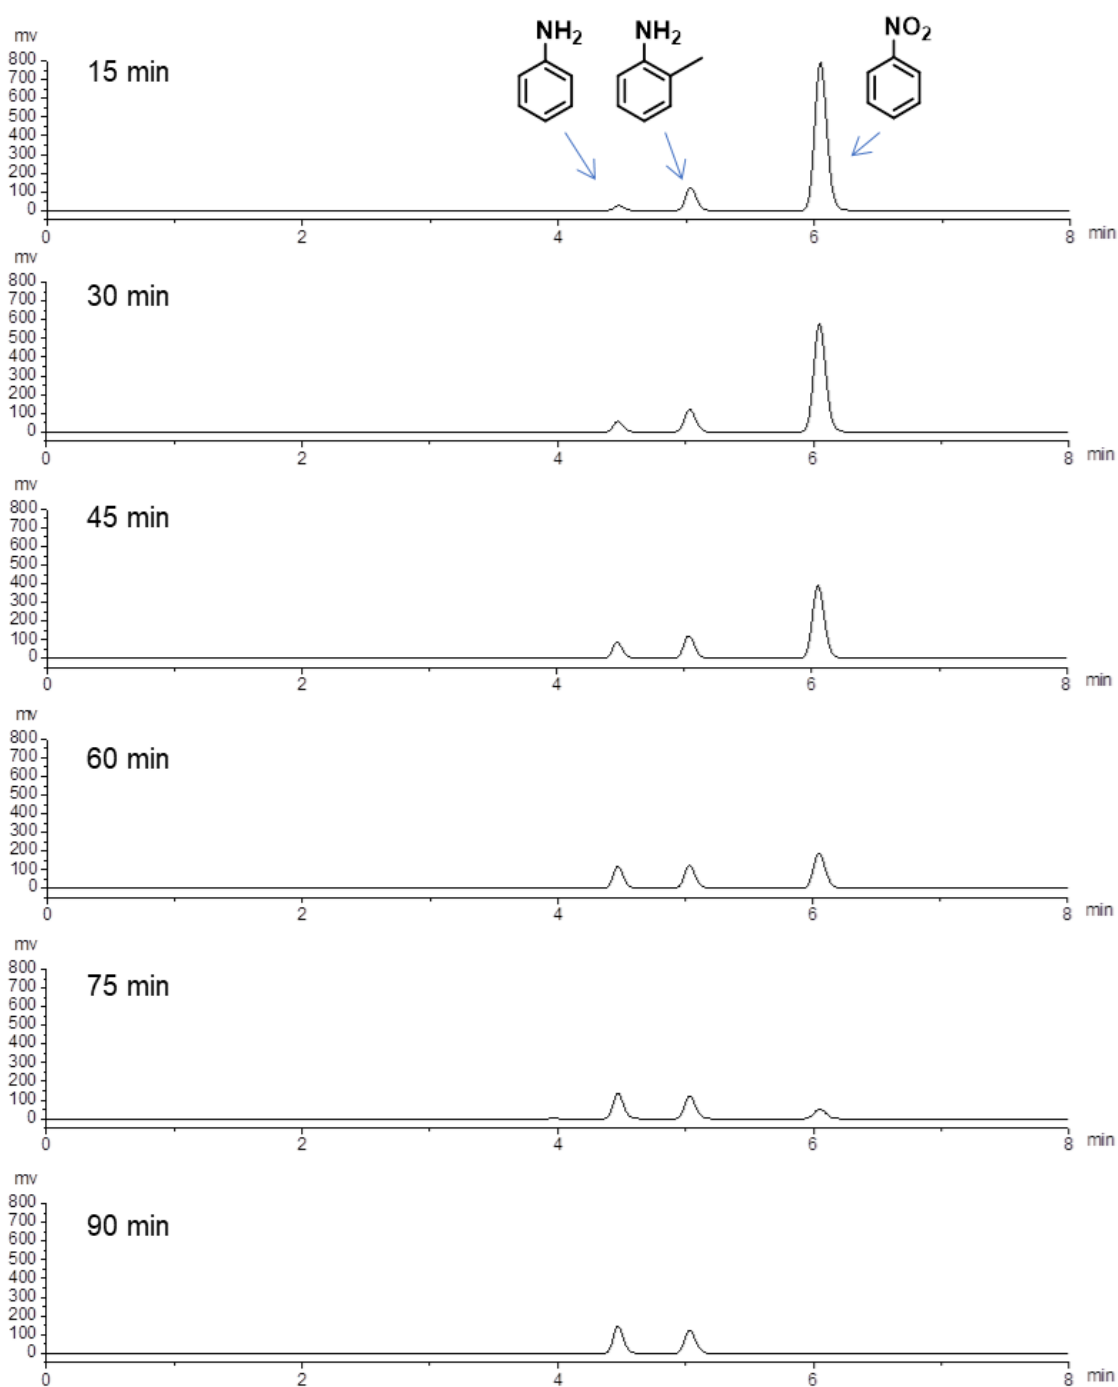

**Figure S23.** HPLC data for the yields of aniline of the photocatalytic reduction of nitrobenzene catalyzed by  $C_{1F}$  (0.60 mM) using m-toluidine as integral standard at 15 min, 30 min, 45 min, 60 min, 75 min, 90 min, respectively.

| Peaks  | Retention time (min) | Height  | Area     | Area (%) |
|--------|----------------------|---------|----------|----------|
| 15 min |                      |         |          |          |
| 1      | 4.470                | 28.336  | 163.347  | 2.602    |
| 2      | 5.032                | 121.696 | 756.928  | 12.055   |
| 3      | 6.047                | 793.963 | 5358.528 | 85.343   |
| 30 min |                      |         |          |          |
| 1      | 4.469                | 58.068  | 333.795  | 6.685    |
| 2      | 5.031                | 121.940 | 759.473  | 15.210   |
| 3      | 6.047                | 577.579 | 3900.050 | 78.105   |
| 45 min |                      |         |          |          |
| 1      | 4.471                | 85.846  | 494.151  | 12.694   |
| 2      | 5.034                | 123.069 | 766.593  | 19.693   |
| 3      | 6.048                | 390.712 | 2632.053 | 67.613   |
| 60 min |                      |         |          |          |
| 1      | 4.470                | 119.385 | 688.272  | 25.022   |
| 2      | 5.033                | 124.540 | 777.103  | 28.251   |
| 3      | 6.048                | 190.322 | 1285.329 | 46.727   |
| 75 min |                      |         |          |          |
| 1      | 4.470                | 137.831 | 793.352  | 41.385   |
| 2      | 5.032                | 122.452 | 764.949  | 39.903   |
| 3      | 6.048                | 52.939  | 358.716  | 18.712   |
| 90 min |                      |         |          |          |
| 1      | 4.470                | 146.367 | 843.851  | 52.174   |
| 2      | 5.032                | 123.785 | 773.538  | 47.826   |



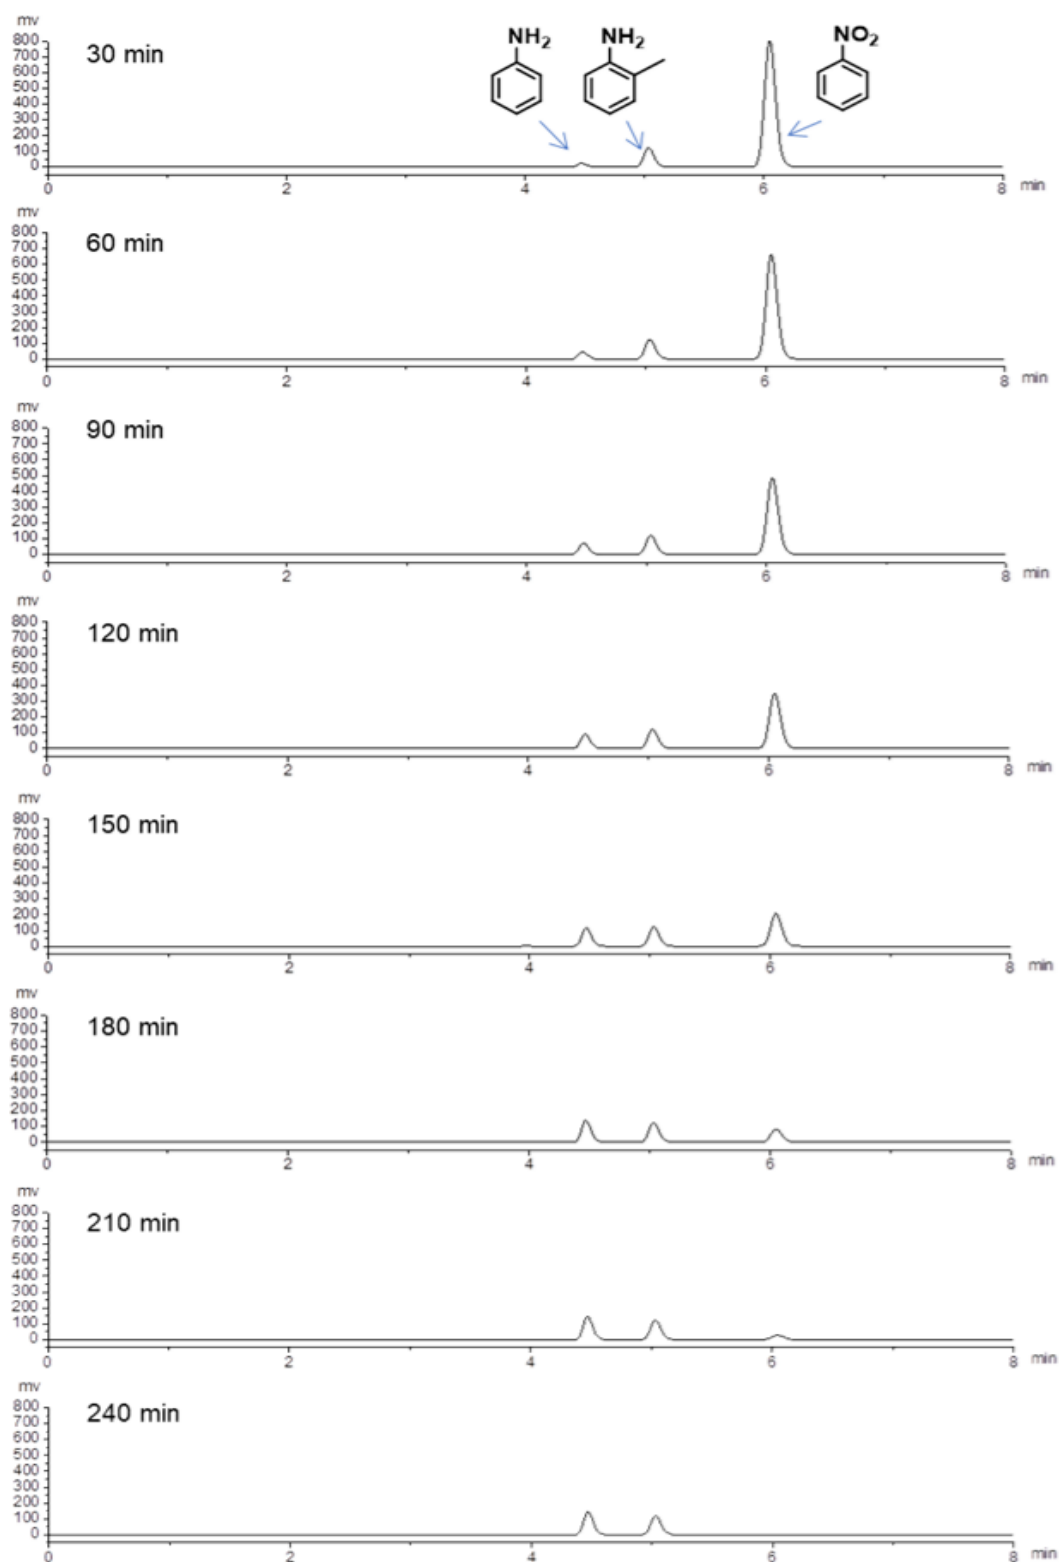

**Figure S24.** HPLC data for the yields of aniline of the photocatalytic reduction of nitrobenzene catalyzed by  $C_{1F}$  (0.20 mM) using m-toluidine as internal standard at 30 min, 60 min, 90 min, 120 min, 150 min, 180 min, 210 min, 240 min, respectively.

| Peaks   | Retention time (min) | Height  | Area     | Area (%) |
|---------|----------------------|---------|----------|----------|
| 30 min  |                      |         |          |          |
| 1       | 4.471                | 24.763  | 142.964  | 2.260    |
| 2       | 5.032                | 123.948 | 770.623  | 12.180   |
| 3       | 6.047                | 802.600 | 5413.197 | 85.560   |
| 60 min  |                      |         |          |          |
| 1       | 4.471                | 47.076  | 271.036  | 4.915    |
| 2       | 5.033                | 124.576 | 775.525  | 14.063   |
| 3       | 6.048                | 662.732 | 4468.196 | 81.022   |
| 90 min  |                      |         |          |          |
| 1       | 4.472                | 73.162  | 420.505  | 9.428    |
| 2       | 5.034                | 122.391 | 761.574  | 17.076   |
| 3       | 6.049                | 486.367 | 3277.904 | 73.496   |
| 120 min |                      |         |          |          |
| 1       | 4.471                | 91.905  | 529.006  | 14.511   |
| 2       | 5.033                | 122.023 | 759.509  | 20.834   |
| 3       | 6.048                | 349.569 | 2356.995 | 64.655   |
| 150 min |                      |         |          |          |
| 1       | 4.471                | 116.301 | 670.371  | 23.605   |
| 2       | 5.033                | 123.317 | 768.225  | 27.050   |
| 3       | 6.048                | 207.778 | 1401.395 | 49.345   |
| 180 min |                      |         |          |          |
| 1       | 4.471                | 137.347 | 792.996  | 37.310   |
| 2       | 5.032                | 123.285 | 769.677  | 36.213   |
| 3       | 6.047                | 82.980  | 562.735  | 26.477   |
| 210 min |                      |         |          |          |
| 1       | 4.470                | 144.872 | 834.444  | 46.323   |
| 2       | 5.031                | 123.479 | 772.128  | 42.863   |
| 3       | 6.044                | 28.384  | 194.796  | 10.814   |
| 240 min |                      |         |          |          |
| 1       | 4.469                | 146.754 | 841.399  | 52.946   |
| 2       | 5.029                | 119.806 | 747.761  | 47.054   |

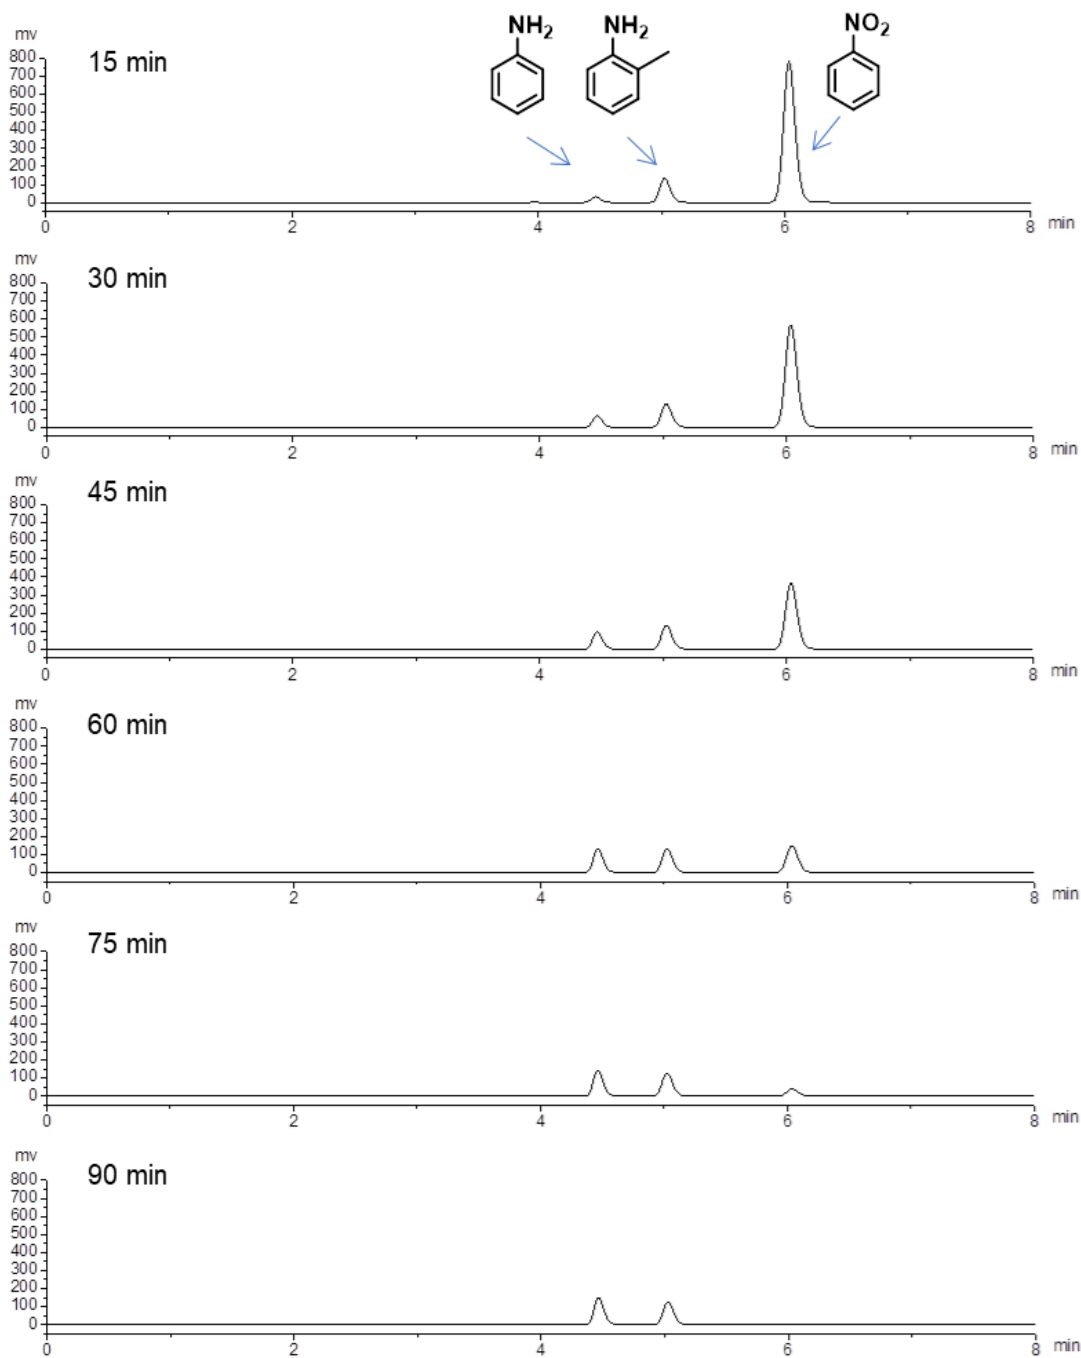

**Figure S25.** HPLC data for the yields of aniline of the photocatalytic reduction of nitrobenzene catalyzed by  $C_{2F}$  (1.0 mM) using m-toluidine as integral standard at 15 min, 30 min, 45 min, 60 min, 75 min, 90 min, respectively.

| Peaks  | Retention time (min) | Height  | Area     | Area (%) |
|--------|----------------------|---------|----------|----------|
| 15 min |                      |         |          |          |
| 1      | 4.464                | 31.981  | 184.541  | 2.917    |
| 2      | 5.023                | 135.051 | 842.385  | 13.316   |
| 3      | 6.035                | 784.522 | 5299.372 | 83.767   |
| 30 min |                      |         |          |          |
| 1      | 4.463                | 64.563  | 372.108  | 7.401    |
| 2      | 5.023                | 130.760 | 815.652  | 16.223   |
| 3      | 6.034                | 569.370 | 3840.109 | 76.376   |
| 45 min |                      |         |          |          |
| 1      | 4.464                | 96.483  | 556.086  | 14.377   |
| 2      | 5.025                | 131.705 | 822.520  | 21.266   |
| 3      | 6.036                | 368.686 | 2489.160 | 64.357   |
| 60 min |                      |         |          |          |
| 1      | 4.464                | 131.171 | 757.392  | 29.295   |
| 2      | 5.024                | 132.493 | 828.396  | 32.041   |
| 3      | 6.035                | 147.779 | 999.607  | 38.664   |
| 75 min |                      |         |          |          |
| 1      | 4.463                | 143.246 | 827.360  | 43.585   |
| 2      | 5.023                | 128.269 | 800.680  | 42.179   |
| 3      | 6.035                | 39.790  | 270.232  | 14.236   |
| 90 min |                      |         |          |          |
| 1      | 4.463                | 151.273 | 873.742  | 52.319   |
| 2      | 5.025                | 127.199 | 796.276  | 47.681   |

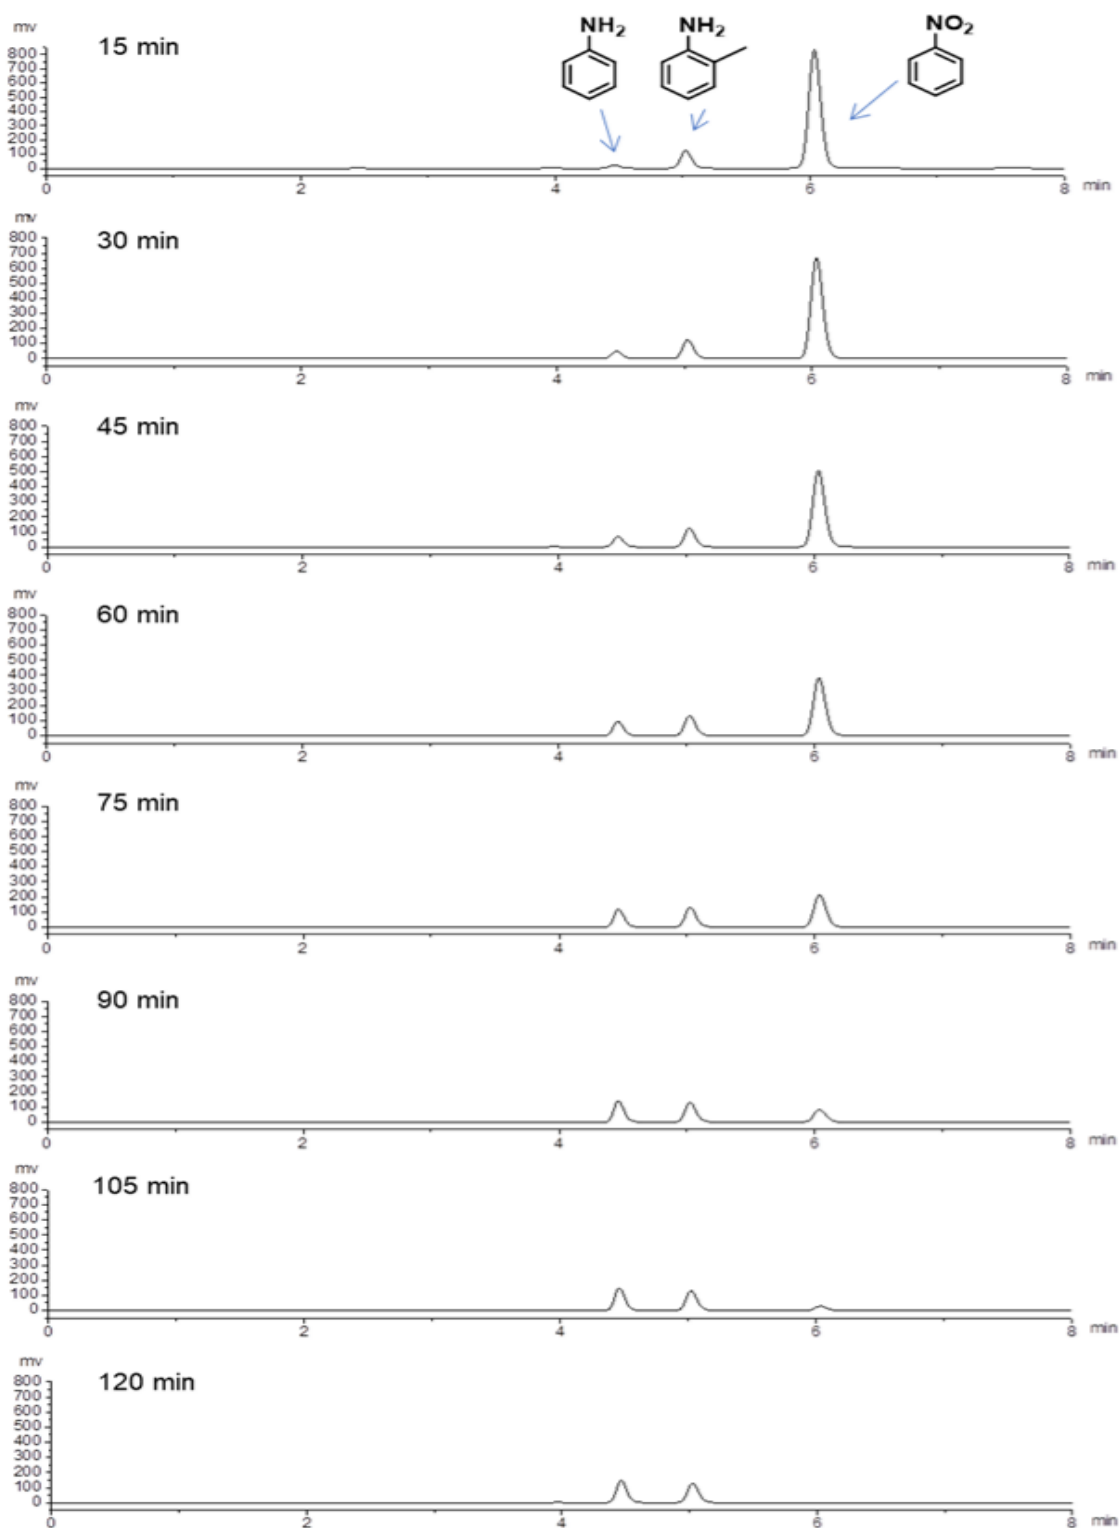

**Figure S26.** HPLC data for the yields of aniline of the photocatalytic reduction of nitrobenzene catalyzed by  $C_{2F}$  (0.60 mM) using m-toluidine as internal standard at 15 min, 30 min, 45 min, 60 min, 75 min, 90 min, 105 min, 120 min, respectively.

| Peaks   | Retention time (min) | Height  | Area     | Area (%) |
|---------|----------------------|---------|----------|----------|
| 15 min  |                      |         |          |          |
| 1       | 4.464                | 23.179  | 133.553  | 2.047    |
| 2       | 5.024                | 124.206 | 772.348  | 11.837   |
| 3       | 6.035                | 833.886 | 5618.723 | 86.116   |
| 30 min  |                      |         |          |          |
| 1       | 4.464                | 48.931  | 281.008  | 5.047    |
| 2       | 5.025                | 125.712 | 782.176  | 14.049   |
| 3       | 6.036                | 668.338 | 4504.406 | 80.904   |
| 45 min  |                      |         |          |          |
| 1       | 4.465                | 69.639  | 399.618  | 8.663    |
| 2       | 5.025                | 126.950 | 790.828  | 17.143   |
| 3       | 6.035                | 507.813 | 3422.558 | 74.194   |
| 60 min  |                      |         |          |          |
| 1       | 4.464                | 95.510  | 549.973  | 13.946   |
| 2       | 5.024                | 131.097 | 818.215  | 20.748   |
| 3       | 6.035                | 381.552 | 2575.455 | 65.306   |
| 75 min  |                      |         |          |          |
| 1       | 4.465                | 119.382 | 687.469  | 23.326   |
| 2       | 5.025                | 130.664 | 816.181  | 27.693   |
| 3       | 6.036                | 213.418 | 1443.626 | 48.981   |
| 90 min  |                      |         |          |          |
| 1       | 4.463                | 139.791 | 806.972  | 36.905   |
| 2       | 5.024                | 130.068 | 814.043  | 37.228   |
| 3       | 6.035                | 83.346  | 565.604  | 25.867   |
| 105 min |                      |         |          |          |
| 1       | 4.463                | 149.291 | 863.217  | 45.830   |
| 2       | 5.023                | 130.479 | 816.425  | 43.346   |
| 3       | 6.036                | 29.779  | 203.875  | 10.824   |
| 120 min |                      |         |          |          |
| 1       | 4.462                | 148.050 | 855.310  | 51.746   |
| 2       | 5.023                | 127.368 | 797.584  | 48.254   |

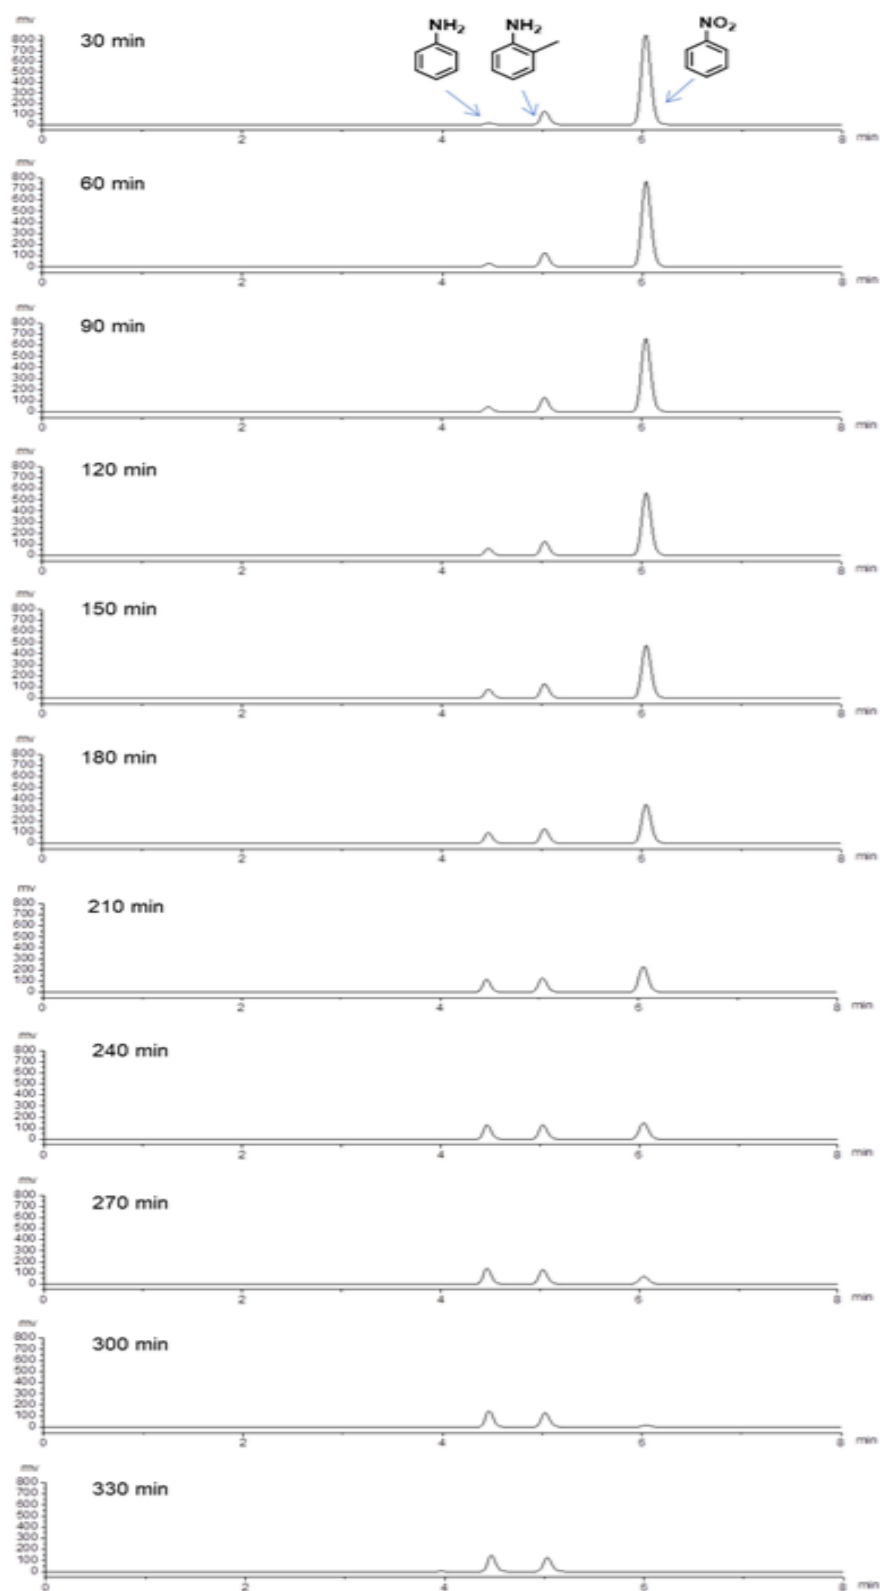

**Figure S27.** HPLC data for the yields of aniline of the photocatalytic reduction of nitrobenzene catalyzed by  $C_{2F}$  (0.20 mM) using m-toluidine as integral standard at 30 min, 60 min, 90 min, 120 min, 150 min, 180 min, 210 min, 240 min, 270 min, 300 min, 330 min, respectively.

| Peaks   | Retention time (min) | Height  | Area     | Area (%) |
|---------|----------------------|---------|----------|----------|
| 30 min  |                      |         |          |          |
| 1       | 4.463                | 14.860  | 86.489   | 1.279    |
| 2       | 5.023                | 127.108 | 793.075  | 11.732   |
| 3       | 6.034                | 872.746 | 5880.406 | 86.989   |
| 60 min  |                      |         |          |          |
| 1       | 4.463                | 31.544  | 182.437  | 2.951    |
| 2       | 5.024                | 127.457 | 795.003  | 12.861   |
| 3       | 6.037                | 768.166 | 5204.007 | 84.188   |
| 90 min  |                      |         |          |          |
| 1       | 4.464                | 49.483  | 285.026  | 5.087    |
| 2       | 5.026                | 130.408 | 814.805  | 14.542   |
| 3       | 6.042                | 666.495 | 4503.301 | 80.371   |
| 120 min |                      |         |          |          |
| 1       | 4.466                | 63.945  | 367.382  | 7.412    |
| 2       | 5.029                | 127.200 | 798.161  | 16.104   |
| 3       | 6.046                | 559.512 | 3790.791 | 76.484   |
| 150 min |                      |         |          |          |
| 1       | 4.466                | 79.886  | 459.009  | 10.245   |
| 2       | 5.029                | 128.799 | 807.107  | 18.015   |
| 3       | 6.046                | 473.954 | 3214.150 | 71.740   |
| 180 min |                      |         |          |          |
| 1       | 4.465                | 96.902  | 556.775  | 14.883   |
| 2       | 5.028                | 129.791 | 811.977  | 21.704   |
| 3       | 6.045                | 350.559 | 2372.342 | 63.413   |
| 210 min |                      |         |          |          |
| 1       | 4.466                | 115.883 | 665.696  | 21.952   |
| 2       | 5.028                | 128.859 | 806.434  | 26.593   |
| 3       | 6.044                | 230.812 | 1560.401 | 51.455   |
| 240 min |                      |         |          |          |
| 1       | 4.467                | 129.951 | 746.268  | 29.141   |
| 2       | 5.029                | 129.151 | 809.914  | 31.626   |
| 3       | 6.044                | 148.580 | 1004.693 | 39.233   |
| 270 min |                      |         |          |          |
| 1       | 4.466                | 142.550 | 819.440  | 39.175   |
| 2       | 5.028                | 128.462 | 806.391  | 38.551   |
| 3       | 6.045                | 68.359  | 465.922  | 22.274   |
| 300 min |                      |         |          |          |
| 1       | 4.467                | 146.588 | 841.618  | 51.176   |
| 2       | 5.029                | 127.984 | 802.942  | 48.824   |
| 330 min |                      |         |          |          |
| 1       | 4.467                | 147.612 | 846.606  | 52.111   |
| 2       | 5.029                | 124.072 | 778.000  | 47.889   |



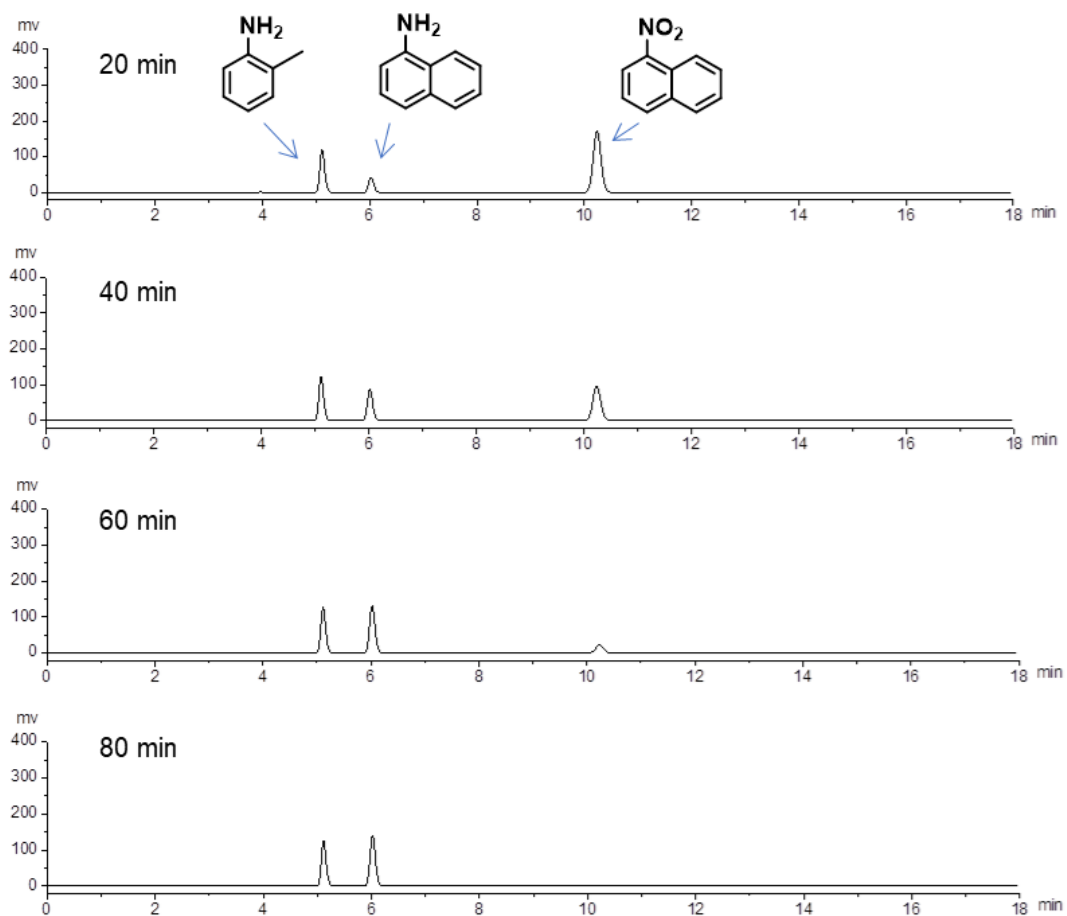

**Figure S28.** HPLC data for the yields of 1-aminoanthracene of the photocatalytic reduction of 1-nitroanthracene catalyzed by C<sub>1F</sub> (1.0 mM) using m-toluidine as integral standard at 20 min, 40 min, 60 min, 80 min, respectively.

| Peaks  | Retention time (min) | Height  | Area     | Area (%) |
|--------|----------------------|---------|----------|----------|
| 20 min |                      |         |          |          |
| 1      | 5.111                | 120.884 | 776.183  | 26.972   |
| 2      | 6.021                | 42.381  | 305.322  | 10.610   |
| 3      | 10.239               | 170.638 | 1796.185 | 62.418   |
| 40 min |                      |         |          |          |
| 1      | 5.114                | 124.613 | 802.193  | 32.900   |
| 2      | 6.022                | 86.721  | 625.827  | 25.667   |
| 3      | 10.238               | 96.537  | 1010.246 | 41.433   |
| 60 min |                      |         |          |          |
| 1      | 5.114                | 126.908 | 814.353  | 40.574   |
| 2      | 6.023                | 131.270 | 948.054  | 47.235   |
| 3      | 10.236               | 23.366  | 244.675  | 12.191   |
| 80 min |                      |         |          |          |
| 1      | 5.114                | 126.377 | 808.896  | 44.138   |
| 2      | 6.021                | 141.697 | 1023.742 | 55.862   |

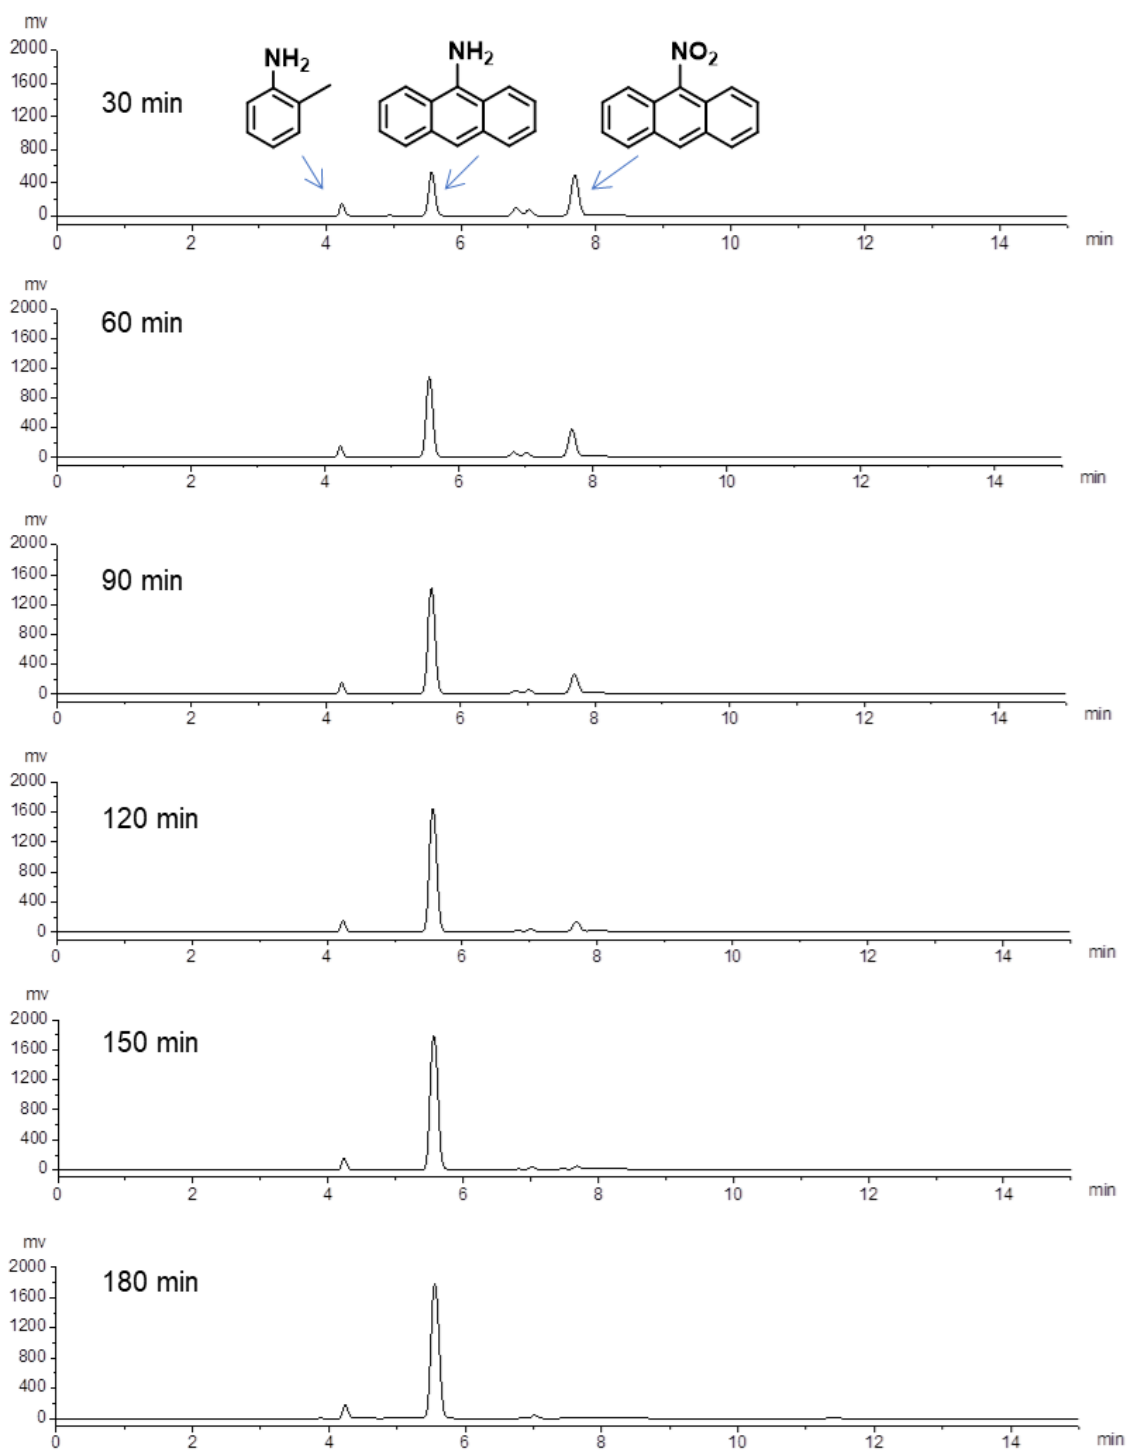

**Figure S29.** HPLC data for the yields of 9-aminoanthracene of the photocatalytic reduction of 9-nitroanthracene catalyzed by  $C_{1F}$  (1.0 mM) using m-toluidine as integral standard at 30 min, 60 min, 90 min, 120 min, 150 min, 180 min respectively.

| Peaks   | Retention time (min) | Height   | Area      | Area (%) |
|---------|----------------------|----------|-----------|----------|
| 30 min  |                      |          |           |          |
| 1       | 4.229                | 152.735  | 799.694   | 9.558    |
| 2       | 5.564                | 530.863  | 3587.152  | 42.874   |
| 3       | 7.688                | 502.320  | 3979.840  | 47.568   |
| 60 min  |                      |          |           |          |
| 1       | 4.229                | 154.638  | 806.699   | 6.958    |
| 2       | 5.562                | 1075.461 | 7767.822  | 66.996   |
| 3       | 7.690                | 379.254  | 3019.906  | 26.046   |
| 90 min  |                      |          |           |          |
| 1       | 4.233                | 156.361  | 811.544   | 5.876    |
| 2       | 5.567                | 1424.591 | 10862.209 | 78.650   |
| 3       | 7.692                | 264.701  | 2137.038  | 15.474   |
| 120 min |                      |          |           |          |
| 1       | 4.234                | 156.493  | 817.815   | 5.363    |
| 2       | 5.566                | 1649.179 | 13268.880 | 87.020   |
| 3       | 7.687                | 140.929  | 1161.425  | 7.617    |
| 150 min |                      |          |           |          |
| 1       | 4.236                | 157.321  | 831.213   | 5.171    |
| 2       | 5.568                | 1784.263 | 14803.032 | 92.091   |
| 3       | 7.690                | 51.229   | 440.114   | 2.738    |
| 180 min |                      |          |           |          |
| 1       | 4.238                | 185.129  | 1042.363  | 6.423    |
| 2       | 5.553                | 1780.352 | 15186.762 | 93.577   |

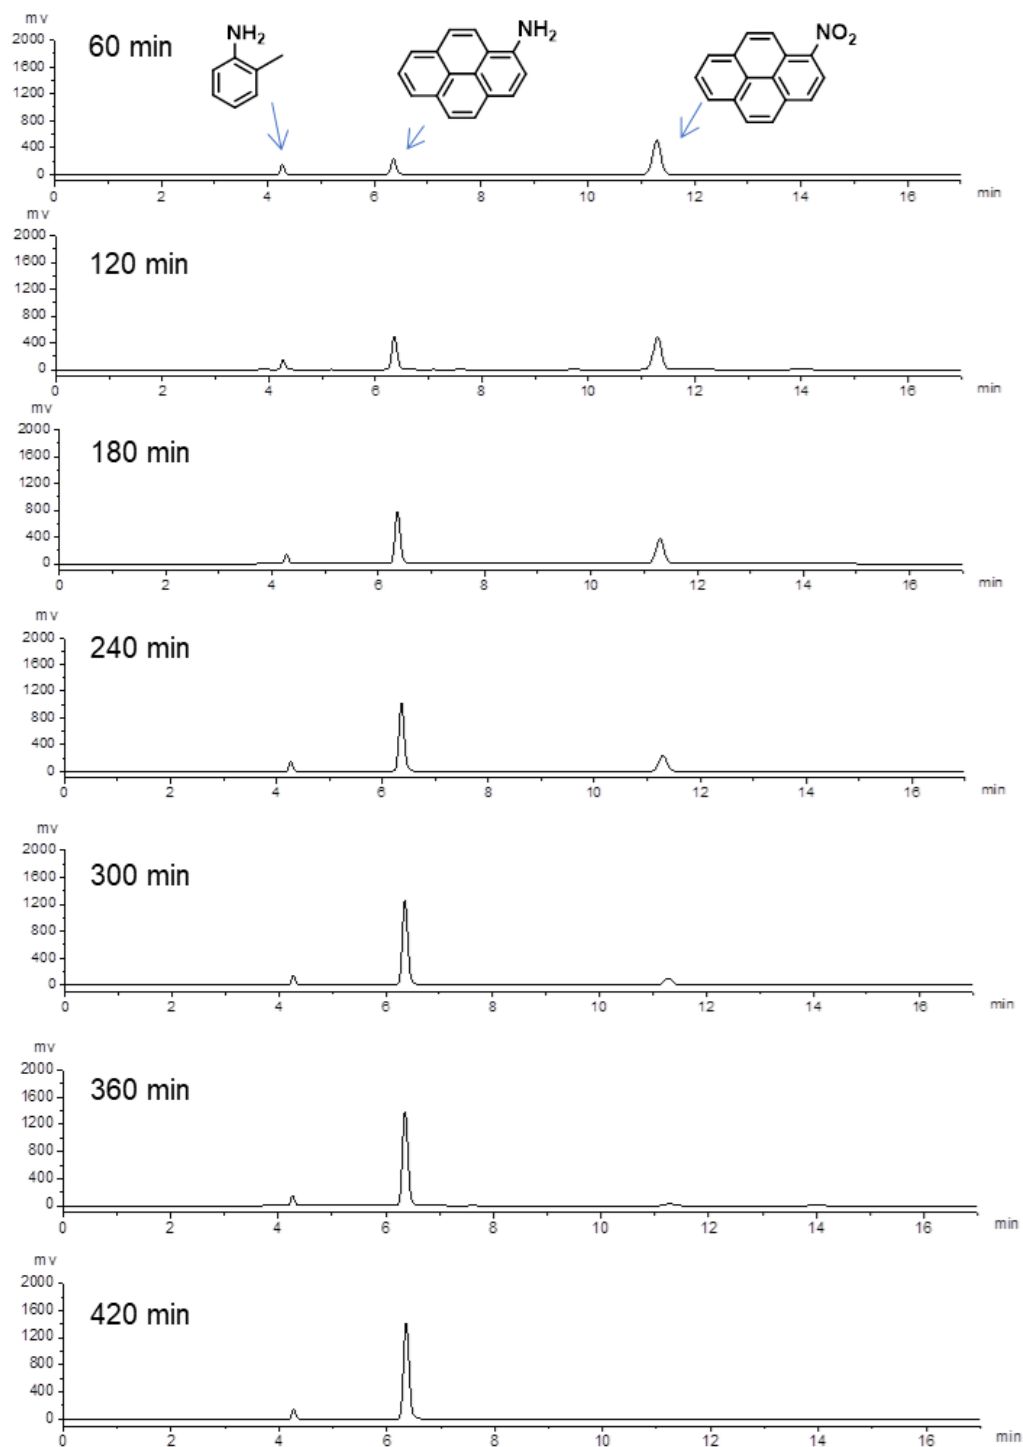

**Figure S30.** HPLC data for the yields of 1-aminopyrene of the photocatalytic reduction of 1-nitropyrene catalyzed by  $C_{1F}$  (1.0 mM) using m-toluidine as integral standard at 60 min, 120 min, 180 min, 240 min, 300 min, 360 min, 420 min, respectively.

| Peaks   | Retention time (min) | Height   | Area      | Area (%) |
|---------|----------------------|----------|-----------|----------|
| 60 min  |                      |          |           |          |
| 1       | 4.268                | 148.210  | 772.767   | 9.502    |
| 2       | 6.356                | 234.365  | 1679.970  | 20.657   |
| 3       | 11.299               | 515.103  | 5680.042  | 69.841   |
| 120 min |                      |          |           |          |
| 1       | 4.267                | 147.054  | 766.943   | 7.876    |
| 2       | 6.357                | 505.659  | 3593.509  | 36.902   |
| 3       | 11.303               | 486.821  | 5377.617  | 55.222   |
| 180 min |                      |          |           |          |
| 1       | 4.267                | 149.247  | 779.535   | 7.419    |
| 2       | 6.358                | 786.309  | 5635.706  | 53.638   |
| 3       | 11.302               | 370.796  | 4091.640  | 38.943   |
| 240 min |                      |          |           |          |
| 1       | 4.269                | 150.754  | 792.096   | 7.304    |
| 2       | 6.359                | 1031.544 | 7416.526  | 68.389   |
| 3       | 11.299               | 239.165  | 2636.016  | 24.307   |
| 300 min |                      |          |           |          |
| 1       | 4.268                | 147.115  | 772.105   | 6.987    |
| 2       | 6.358                | 1251.573 | 9141.182  | 82.716   |
| 3       | 11.282               | 103.419  | 1138.039  | 10.297   |
| 360 min |                      |          |           |          |
| 1       | 4.269                | 148.796  | 781.263   | 6.898    |
| 2       | 6.359                | 1384.941 | 10195.352 | 90.023   |
| 3       | 11.282               | 31.725   | 348.628   | 3.079    |
| 420 min |                      |          |           |          |
| 1       | 4.267                | 147.515  | 766.445   | 6.768    |
| 2       | 6.357                | 1413.798 | 10382.617 | 93.232   |

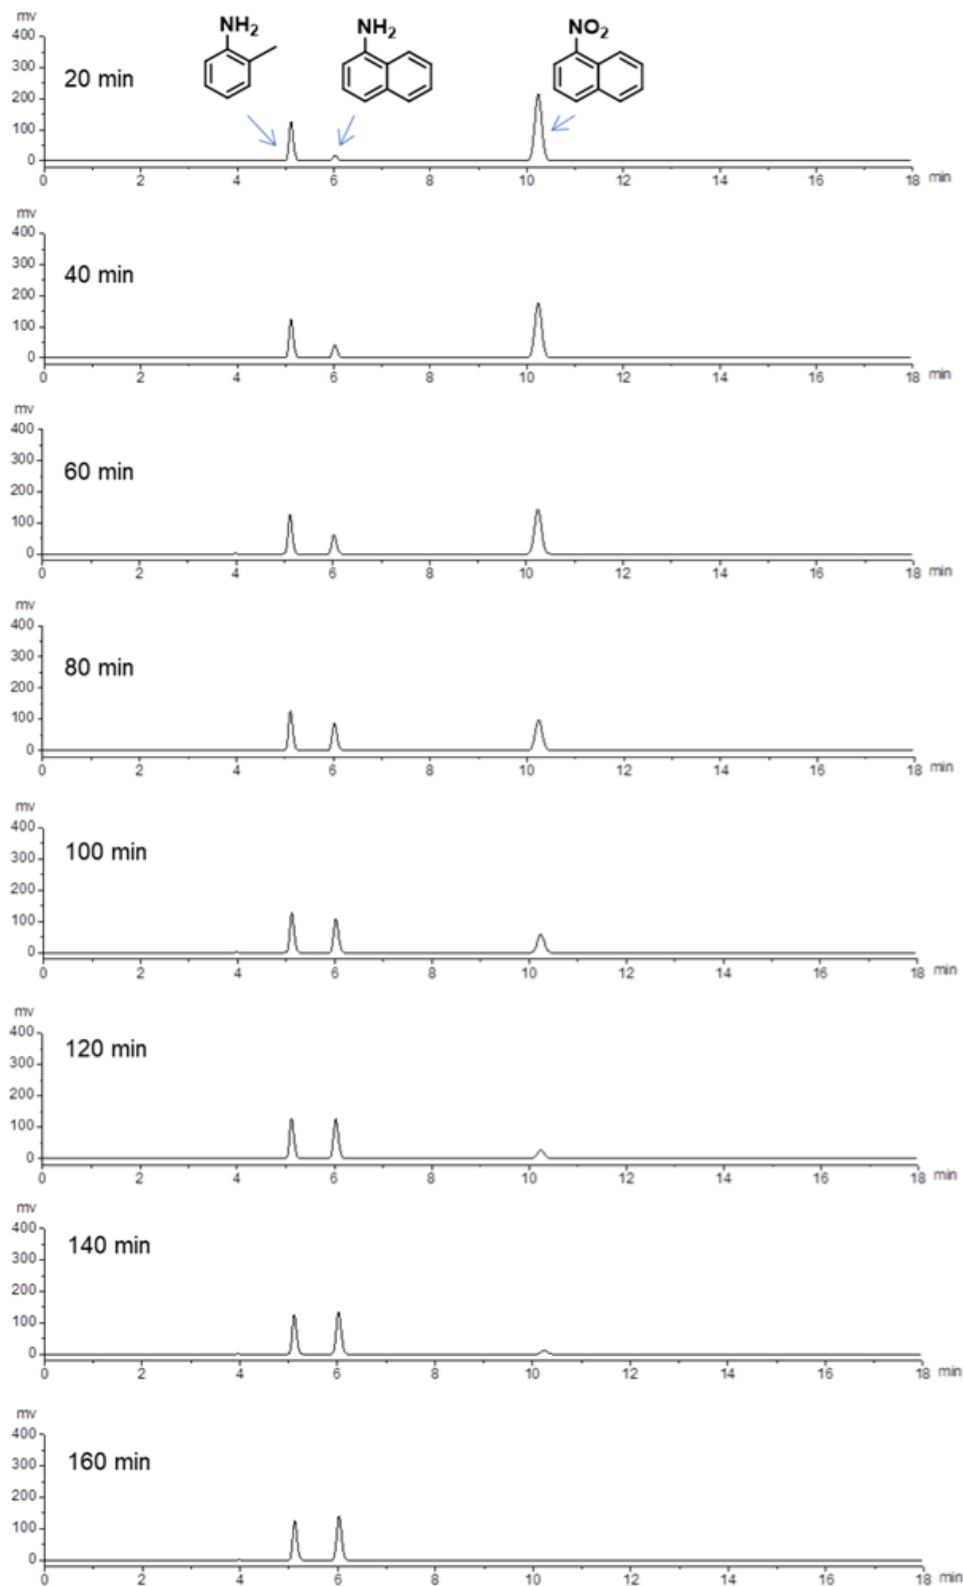

**Figure S31.** HPLC data for the yields of 1-aminoanthracene of the photocatalytic reduction of 1-nitroanthracene catalyzed by  $C_{2}F$  (1.0 mM) using m-toluidine as integral standard at 20 min, 40 min, 60 min, 80 min, 100 min, 120 min, 140 min, 160 min, respectively.

| Peaks   | Retention time (min) | Height  | Area     | Area (%) |
|---------|----------------------|---------|----------|----------|
| 20 min  |                      |         |          |          |
| 1       | 5.114                | 126.725 | 816.617  | 25.446   |
| 2       | 6.023                | 18.648  | 133.100  | 4.148    |
| 3       | 10.237               | 214.988 | 2259.436 | 70.406   |
| 40 min  |                      |         |          |          |
| 1       | 5.114                | 125.735 | 812.478  | 27.328   |
| 2       | 6.022                | 42.241  | 302.678  | 10.181   |
| 3       | 10.237               | 176.840 | 1857.957 | 62.491   |
| 60 min  |                      |         |          |          |
| 1       | 5.115                | 128.976 | 833.093  | 29.597   |
| 2       | 6.024                | 62.401  | 448.899  | 15.948   |
| 3       | 10.238               | 146.117 | 1532.781 | 54.455   |
| 80 min  |                      |         |          |          |
| 1       | 5.115                | 127.919 | 825.411  | 33.048   |
| 2       | 6.023                | 87.377  | 631.161  | 25.270   |
| 3       | 10.239               | 99.328  | 1041.051 | 41.682   |
| 100 min |                      |         |          |          |
| 1       | 5.116                | 127.620 | 818.364  | 36.740   |
| 2       | 6.024                | 109.345 | 788.992  | 35.421   |
| 3       | 10.240               | 59.290  | 620.105  | 27.839   |
| 120 min |                      |         |          |          |
| 1       | 5.117                | 128.056 | 820.267  | 40.323   |
| 2       | 6.026                | 126.457 | 914.895  | 44.975   |
| 3       | 10.238               | 28.556  | 299.080  | 14.702   |
| 140 min |                      |         |          |          |
| 1       | 5.117                | 126.892 | 810.927  | 42.049   |
| 2       | 6.025                | 135.834 | 981.881  | 50.914   |
| 3       | 10.240               | 12.952  | 135.708  | 7.037    |
| 160 min |                      |         |          |          |
| 1       | 5.117                | 127.609 | 814.230  | 44.433   |
| 2       | 6.025                | 140.809 | 1018.258 | 55.567   |



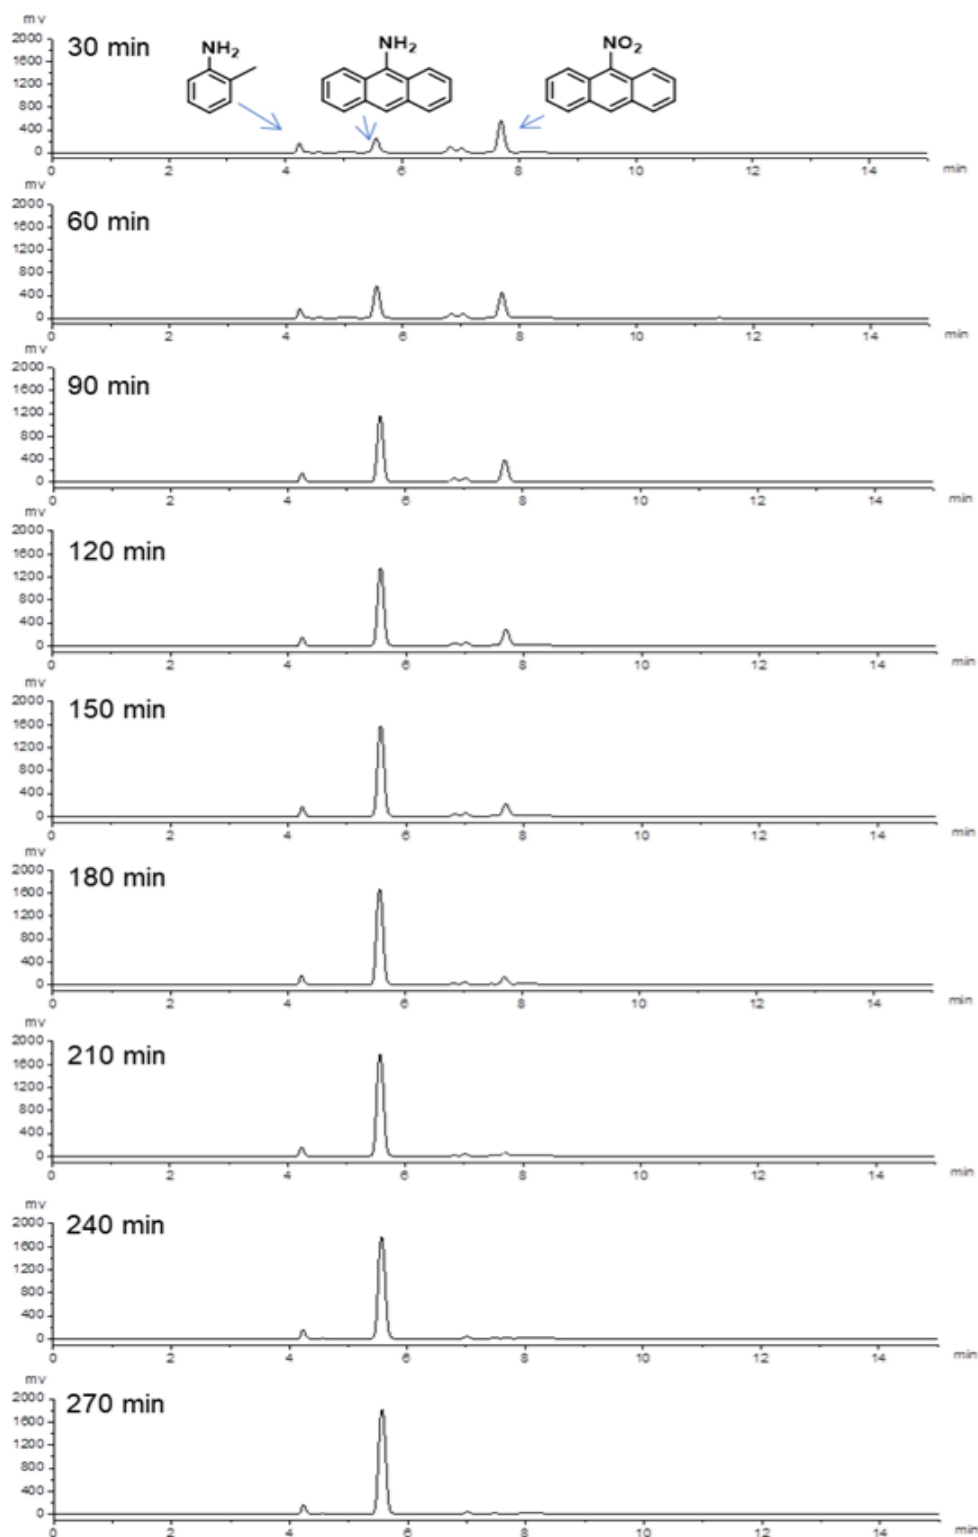

**Figure S32.** HPLC data for the yields of 9-aminoanthracene of the photocatalytic reduction of 9-nitroanthracene catalyzed by  $C_{2F}$  (1.0 mM) using m-toluidine as integral standard at 30 min, 60 min, 90 min, 120 min, 150 min, 180 min, 210 min, 240 min, 270 min, respectively.

| Peaks   | Retention time (min) | Height   | Area      | Area (%) |
|---------|----------------------|----------|-----------|----------|
| 30 min  |                      |          |           |          |
| 1       | 4.236                | 162.618  | 859.753   | 11.806   |
| 2       | 5.554                | 248.898  | 1921.529  | 26.386   |
| 3       | 7.693                | 568.882  | 4501.195  | 61.808   |
| 60 min  |                      |          |           |          |
| 1       | 4.237                | 166.838  | 890.171   | 10.106   |
| 2       | 5.555                | 565.286  | 4332.523  | 49.188   |
| 3       | 7.694                | 450.409  | 3585.333  | 40.706   |
| 90 min  |                      |          |           |          |
| 1       | 4.236                | 163.800  | 857.322   | 6.855    |
| 2       | 5.567                | 1163.012 | 8535.199  | 68.250   |
| 3       | 7.691                | 391.662  | 3113.278  | 24.895   |
| 120 min |                      |          |           |          |
| 1       | 4.236                | 159.468  | 837.972   | 6.180    |
| 2       | 5.569                | 1364.422 | 10398.886 | 76.687   |
| 3       | 7.696                | 289.763  | 2323.293  | 17.133   |
| 150 min |                      |          |           |          |
| 1       | 4.238                | 164.342  | 869.041   | 5.742    |
| 2       | 5.570                | 1576.524 | 12497.840 | 82.570   |
| 3       | 7.696                | 219.223  | 1769.093  | 11.688   |
| 180 min |                      |          |           |          |
| 1       | 4.238                | 163.648  | 866.510   | 5.572    |
| 2       | 5.570                | 1681.789 | 13632.091 | 87.666   |
| 3       | 7.696                | 128.737  | 1051.403  | 6.762    |
| 210 min |                      |          |           |          |
| 1       | 4.237                | 163.056  | 868.643   | 5.411    |
| 2       | 5.568                | 1774.757 | 14679.636 | 91.448   |
| 3       | 7.695                | 60.266   | 504.080   | 3.141    |
| 240 min |                      |          |           |          |
| 1       | 4.237                | 162.964  | 870.464   | 5.552    |
| 2       | 5.568                | 1767.845 | 14646.370 | 93.423   |
| 3       | 7.694                | 17.968   | 160.618   | 1.025    |
| 270 min |                      |          |           |          |
| 1       | 4.237                | 167.383  | 903.208   | 5.579    |
| 2       | 5.564                | 1812.574 | 15287.627 | 94.421   |

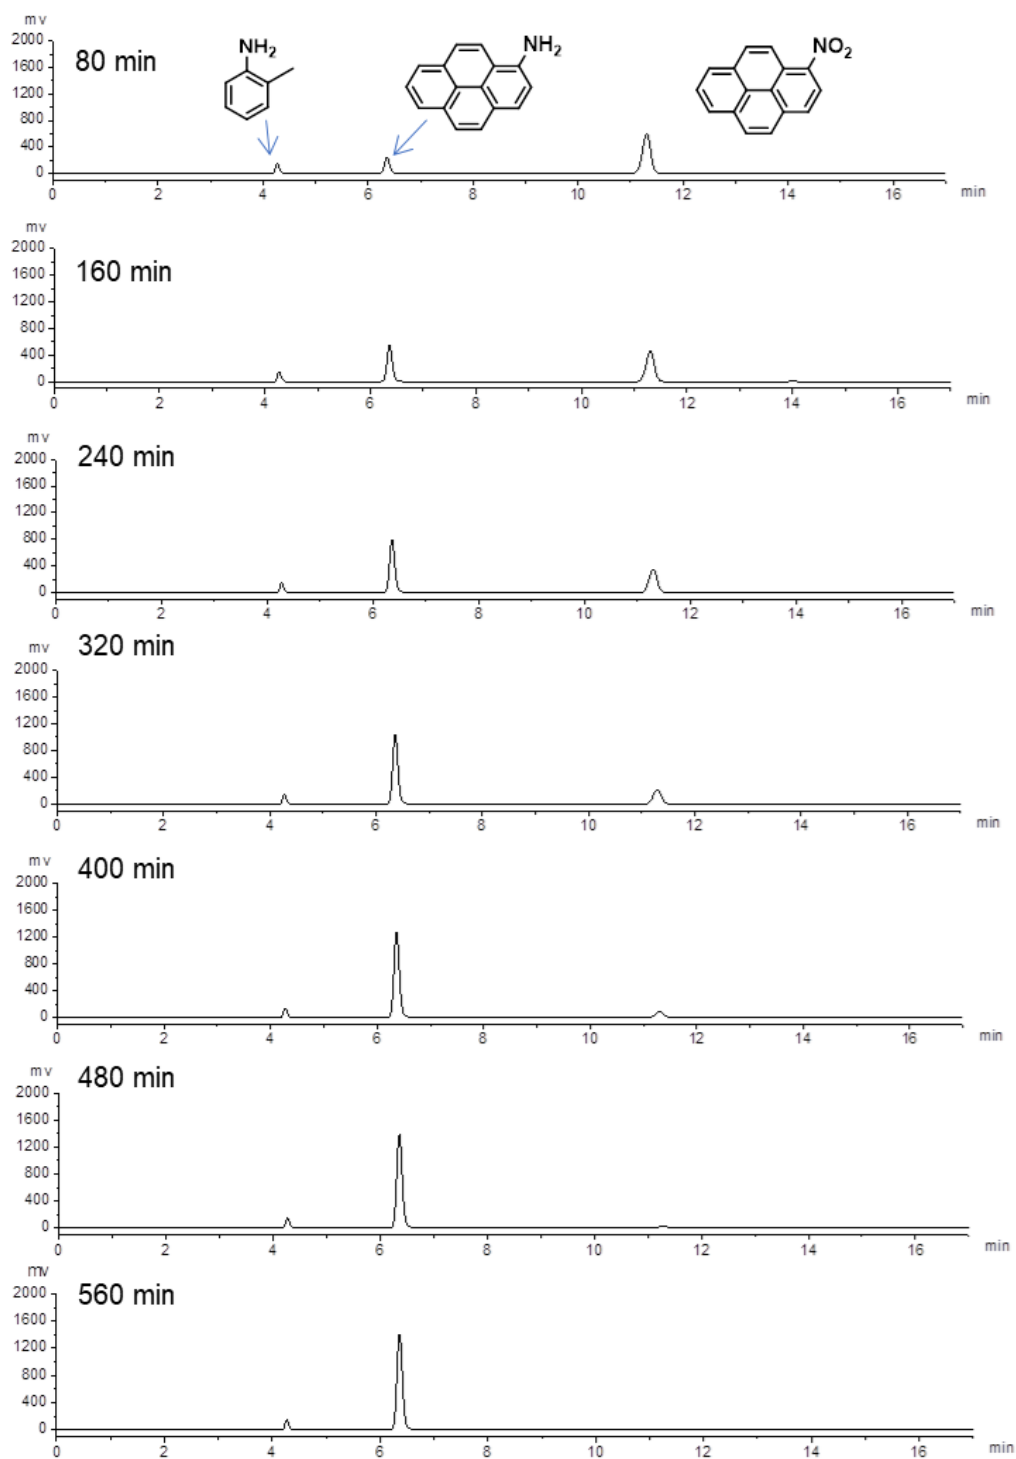

**Figure S33.** HPLC data for the yields of 1-aminopyrene of the photocatalytic reduction of 1-nitropyrene catalyzed by C<sub>2</sub>F (1.0 mM) using m-toluidine as integral standard at 80 min, 160 min, 240 min, 320 min, 400 min, 480 min, 560 min, respectively.

| Peaks   | Retention time (min) | Height   | Area      | Area (%) |
|---------|----------------------|----------|-----------|----------|
| 60 min  |                      |          |           |          |
| 1       | 4.268                | 146.665  | 765.907   | 8.318    |
| 2       | 6.358                | 247.216  | 1789.702  | 19.436   |
| 3       | 11.307               | 601.634  | 6652.390  | 72.246   |
| 120 min |                      |          |           |          |
| 1       | 4.268                | 149.149  | 779.780   | 7.852    |
| 2       | 6.360                | 556.354  | 3997.691  | 40.253   |
| 3       | 11.307               | 467.744  | 5154.045  | 51.895   |
| 180 min |                      |          |           |          |
| 1       | 4.268                | 147.304  | 764.874   | 7.406    |
| 2       | 6.357                | 801.063  | 5710.585  | 55.293   |
| 3       | 11.299               | 349.378  | 3852.315  | 37.301   |
| 240 min |                      |          |           |          |
| 1       | 4.269                | 148.372  | 778.244   | 7.274    |
| 2       | 6.359                | 1037.144 | 7490.559  | 70.014   |
| 3       | 11.294               | 220.603  | 2429.850  | 22.712   |
| 300 min |                      |          |           |          |
| 1       | 4.269                | 148.593  | 780.698   | 7.054    |
| 2       | 6.362                | 1271.706 | 9327.024  | 84.269   |
| 3       | 11.295               | 87.053   | 960.441   | 8.677    |
| 360 min |                      |          |           |          |
| 1       | 4.268                | 151.463  | 794.827   | 7.002    |
| 2       | 6.358                | 1386.931 | 10208.962 | 89.936   |
| 3       | 11.287               | 31.579   | 347.521   | 3.062    |
| 420 min |                      |          |           |          |
| 1       | 4.269                | 149.457  | 784.377   | 6.981    |
| 2       | 6.360                | 1415.446 | 10451.589 | 93.019   |

## 5. References

(S1) SMART, Data collection software (version 5.629) (Bruker AXS Inc., Madison, WI, **2003**).

(S2) SAINT, Data reduction software (version 6.54) (Bruker AXS Inc., Madison, WI, **2003**).

(S3) Sheldrick, G. M. SHELXTL97, Program for Crystal Structure Solution (University of Göttingen: Göttingen, Germany, **1997**).
